# Supplementary material for: Pathology-specific experimental antivenoms for haemotoxic snakebite: The impact of immunogen diversity on the in vitro cross-reactivity and in vivo neutralisation of geographically diverse snake venoms
Source: PLoS Negl Trop Dis. 2021 Aug 18;15(8):e0009659. doi: 10.1371/journal.pntd.0009659 (PMC8423360; doi:10.1371/journal.pntd.0009659)
Supplement: S1 Data — (XLSX) [file pntd.0009659.s007.xlsx]

## Sheet: Time course ELISA
Time course
Immunogen mixture 1
	0 week		4 week		8 week		12 week		16 week		24 week		28 week		32 week		36 week		40 week		42 week		Normal Sheep IgG		Normal Horse IgG		SAIMR POLY		Negative
200	0.2168	0.1814	1.2638	1.2607	1.2435	1.257	1.2786	1.299	1.4229	1.4315	1.3731	1.463	1.9042	1.9769	1.9554	1.9024	1.8917	1.8983	1.8603	1.8406	2.4187	2.3507	0.1425	0.162	0.08	0.0754	2.1999	2.2088	0.1425	0.162
1000	0.304	0.1329	1.2819	1.3084	1.3142	1.3489	1.4091	1.3889	1.508	1.5703	1.4416	1.3967	1.973	1.9686	1.9731	1.9683	1.9481	1.9176	1.9068	1.8921	2.4867	2.4089	0.1301	0.1973	0.0843	0.1917	1.8951	1.89	0.1301	0.1973
5000	0.115	0.1018	1.9675	1.2915	1.3496	1.3659	1.702	1.4729	1.5059	1.4264	1.4762	1.3885	1.9538	1.9339	1.9701	1.9705	1.9258	1.9372	1.9024	1.7896	2.4818	2.4089	0.1218	0.1665	0.0839	0.1043	1.2075	1.1998	0.1218	0.1665
2500	0.0997	0.0947	1.1658	1.1415	1.2434	1.2438	1.2369	1.2991	1.4331	1.3923	1.964	1.9268	1.8909	1.8992	1.8671	1.8744	1.8602	1.854	1.8603	1.8847	2.4293	2.3417	0.1574	0.1656	0.0826	0.0974	0.5138	0.5197	0.1574	0.1656
12500	0.1055	0.0933	0.8879	1.146	1.5939	1.6879	0.9529	0.943	1.1315	1.1176	1.0499	0.9637	1.6904	1.688	1.7011	1.6468	1.6358	1.6665	1.7337	1.7116	2.2019	2.1608	0.1796	0.1393	0.0869	0.084	0.2533	0.2422	0.1796	0.1393
325000	0.1033	0.0927	0.4659	0.4358	0.5917	0.6073	0.516	0.5012	0.5827	0.6696	0.9541	0.5353	1.3872	1.347	1.3738	1.218	1.1967	1.3126	1.3782	1.3522	1.9312	1.8058	0.151	0.1181	0.0846	0.081	0.1521	0.1451	0.151	0.1181
3125000	0.0933	0.0911	0.2115	0.2138	0.3436	0.7254	0.2321	0.2104	0.2444	0.2916	0.228	0.2576	0.9663	0.8599	0.9063	0.7366	0.7414	0.8572	0.7976	0.8983	1.4367	1.2751	0.1617	0.095	0.0832	0.0856	0.1327	0.1123	0.1617	0.095
15625000	0.0929	0.0884	0.1204	0.143	0.1729	0.1587	0.1327	0.1259	0.1251	0.1475	0.1297	0.1936	0.6405	0.5138	0.5875	0.4309	0.4249	0.5218	0.4488	0.5008	0.8847	0.8006	0.0963	0.0931	0.0844	0.0821	0.1264	0.0966	0.0963	0.0931
78125000	0.0935	0.0934	0.1	0.1288	0.5019	0.3518	0.1076	0.1084	0.1228	0.1082	0.1483	0.1436	0.3919	0.3147	0.3715	0.3199	0.333	0.362	0.4049	0.2971	0.5168	0.4455	0.0779	0.0795	0.08	0.0843	0.1361	0.0964	0.0779	0.0795
390625000	0.0936	0.1269	0.0963	0.1111	0.096	0.0942	0.099	0.0985	0.1314	0.0931	0.1007	0.1463	0.2458	0.2475	0.2639	0.3235	0.333	0.2432	0.2219	0.2317	0.3597	0.2694	0.0715	0.0743	0.0869	0.0846	0.0882	0.0965	0.0715	0.0743
Immunogen mixture 2
	0 week		4 week		8 week		12 week		16 week		24 week		28 week		32 week		36 week		40 week		42 week		Normal Sheep IgG		Normal Horse IgG		SAIMR POLY		Negative
200	0.1627	0.168	1.0183	1.0059	1.0487	1.1717	1.1427	1.1683	1.2125	1.2551	1.1935	1.2072	1.985	2.0013	1.9675	1.9418	1.9306	1.9331	1.8614	1.9474	2.2771	2.2684	0.1425	0.162	0.08	0.0754	2.0944	2.0709	0.1425	0.162
1000	0.1219	0.1226	1.1416	1.1322	1.2534	1.1229	1.185	1.2079	1.2395	1.2372	1.2242	1.2334	2.0913	2.0195	1.9558	1.9453	1.9569	1.9762	1.9173	1.9596	2.2696	2.316	0.1301	0.1973	0.0843	0.1917	1.7481	1.7583	0.1301	0.1973
5000	0.1023	0.2112	1.8049	1.1375	1.89	1.185	1.2179	1.2357	1.1964	1.2226	1.2131	1.2249	2.0654	1.9767	1.9652	1.9396	1.9245	1.9592	1.8713	1.8724	2.2801	2.3227	0.1218	0.1665	0.0839	0.1043	1.1465	1.0794	0.1218	0.1665
2500	0.097	0.0964	1.1711	1.1536	1.9447	1.1796	1.2322	1.8827	1.1956	1.1915	1.2043	1.1998	1.8928	1.8679	1.8867	1.8668	1.8556	1.8168	1.8018	1.8425	2.3566	2.3279	0.1574	0.1656	0.0826	0.0974	0.6582	0.5107	0.1574	0.1656
12500	0.1093	0.0921	1.0028	1.6035	1.7187	1.8861	1.0175	1.7332	0.972	0.9991	0.968	1.0263	1.7672	1.6726	1.678	1.6635	1.5282	1.5264	1.6475	1.6161	2.2756	2.1718	0.1796	0.1393	0.0869	0.084	0.3405	0.2885	0.1796	0.1393
325000	0.0982	0.0911	0.6904	0.8984	0.6039	0.7141	0.6023	0.6724	0.5413	0.6141	0.9659	0.6487	1.4583	1.4035	1.3321	1.2719	1.0718	1.0822	1.2998	1.275	2.0042	1.8019	0.151	0.1181	0.0846	0.081	0.214	0.1945	0.151	0.1181
3125000	0.0898	0.0905	0.3583	0.207	0.2868	0.3291	0.2675	0.3126	0.28	0.3051	0.2677	0.3483	0.9612	0.9431	0.9927	0.8402	0.6683	0.6323	0.9089	0.8128	1.5618	1.4547	0.1617	0.095	0.0832	0.0856	0.1384	0.1271	0.1617	0.095
15625000	0.0901	0.1006	0.2028	0.4381	0.6653	0.1796	0.1368	0.1494	0.1411	0.1756	0.1539	0.2204	0.533	0.5026	0.5885	0.5029	0.4087	0.3772	0.5939	0.5001	1.1391	1.0092	0.0963	0.0931	0.0844	0.0821	0.1466	0.108	0.0963	0.0931
78125000	0.0946	0.0889	0.475	0.3346	0.1112	0.1216	0.1155	0.1104	0.1123	0.1208	0.108	0.6696	0.3015	0.2963	0.3503	0.3335	0.2336	0.283	0.3645	0.3045	0.6894	0.5726	0.0779	0.0795	0.08	0.0843	0.1412	0.102	0.0779	0.0795
390625000	0.1052	0.1072	0.1135	0.1235	0.0941	0.0953	0.09	0.0922	0.0936	0.1093	0.1084	0.0999	0.2217	0.2549	0.1941	0.2246	0.2268	0.1719	0.1591	0.13	0.2314	0.1895	0.0715	0.0743	0.0869	0.0846	0.1564	0.104	0.0715	0.0743

## Sheet: EPT ELISA
Raw data of Bothrops asper
<>	1	2	3	4	5	6	7	8	9	10	11	12
A	0.1318	2.4758	3.17	2.3899	3.1819	0.0995	2.17	2.1807	0.8017	0.3583	0.1305	0.1325
B	0.1363	2.3511	2.4375	2.2929	2.4061	0.0989	2.0537	1.4451	1.3321	0.3028	0.1208	0.1378
C	0.1561	2.4282	2.5358	2.4198	2.3543	0.1661	2.2745	2.1167	1.1907	0.893	0.1173	0.1359
D	0.1195	2.3711	2.4253	2.3129	2.3096	0.0983	2.0835	1.6756	1.2762	1.0433	0.5581	0.1687
E	0.1242	0.4941	0.2291	0.1469	0.0983	0.0961	0.1354	0.1612	0.1302	0.5655	0.1368	0.1498
F	0.111	0.5186	0.1865	0.1499	0.0945	0.3149	0.1098	0.5824	0.582	0.1073	0.0989	0.1301
G	0.1022	2.0154	1.811	1.3442	0.5885	0.0892	0.2748	0.2409	0.0937	0.098	0.0898	0.1121
H	0.1503	2.1104	2.2283	1.9484	0.599	0.1197	0.2494	0.1581	0.0891	0.0919	0.0953	0.1108
			EAV 1		EAV 2		Normal sheep IgG		SAIMR POLY		Normal Horse IgG
		1:100	2.4758	2.3511	2.4282	2.3711	0.4941	0.5186	2.0154	2.1104	0.0745	0.1012
		1:500	3.17	2.4375	2.5358	2.4253	0.2291	0.1865	1.811	2.2283	0.0963	0.135
		1:2500	2.3899	2.2929	2.4198	2.3129	0.1469	0.1499	1.3442	1.9484	0.0985	0.1545
		1:12500	3.1819	2.4061	2.3543	2.3096	0.0983	0.0945	0.5885	0.599	0.1094	0.0632
		1:62500	0.0995	0.0989	0.1661	0.0983	0.0961	0.3149	0.0892	0.1197	0.0793	0.0593
		1:312500	2.17	2.0537	2.2745	2.0835	0.1354	0.1098	0.2748	0.2494	0.0777	0.0609
		1:1562500	2.1807	1.4451	2.1167	1.6756	0.1612	0.5824	0.2409	0.1581	0.0778	0.054
		1:7812500	0.8017	1.3321	1.1907	1.2762	0.1302	0.582	0.0937	0.0891	0.0643	0.0579
		1:39062500	0.3583	0.3028	0.893	1.0433	0.5655	0.1073	0.098	0.0919	0.0809	0.0554
		1:1.95E+08	0.1305	0.1208	0.1173	0.5581	0.1368	0.0989	0.0898	0.0953	0.0655	0.0538
Raw data of Bothrops jararaca
<>	1	2	3	4	5	6	7	8	9	10	11	12
A	0.1181	1.9252	1.8967	1.9172	1.8717	1.7529	1.4642	0.9749	0.4437	0.2006	0.1957	0.1794
B	0.1087	1.9992	1.9026	1.8916	1.9235	1.7485	1.4743	0.9212	0.4239	0.2031	0.1613	0.1844
C	0.1421	1.9006	1.8913	1.8793	1.9171	1.7187	1.4942	1.0776	0.6248	0.3489	0.1427	0.1993
D	0.1342	1.8781	1.9603	1.9325	1.8254	1.7187	1.4137	0.8959	0.4332	0.2874	0.134	0.176
E	0.1527	0.5453	0.2875	0.1726	0.1014	0.1118	0.1294	0.196	0.155	0.1718	0.1229	0.1473
F	0.1402	0.568	0.2004	0.1258	0.1652	0.1318	0.1345	0.1321	0.1141	0.1016	0.1019	0.1448
G	0.1118	1.6956	1.4661	1.0867	0.5776	0.2664	0.1467	0.1071	0.0982	0.1291	0.1177	0.1007
H	0.1137	1.6413	1.419	1.0083	0.4813	0.2284	0.1335	0.0979	0.0962	0.0915	0.1463	0.1149
			EAV 1		EAV 2		Normal sheep IgG		SAIMR POLY		Normal Horse IgG
		1:100	1.9252	1.9992	1.9006	1.8781	0.5453	0.568	1.6956	1.6413	0.0745	0.1012
		1:500	1.8967	1.9026	1.8913	1.9603	0.2875	0.2004	1.4661	1.419	0.0963	0.135
		1:2500	1.9172	1.8916	1.8793	1.9325	0.1726	0.1258	1.0867	1.0083	0.0985	0.1545
		1:12500	1.8717	1.9235	1.9171	1.8254	0.1014	0.1652	0.5776	0.4813	0.1094	0.0632
		1:62500	1.7529	1.7485	1.7187	1.7187	0.1118	0.1318	0.2664	0.2284	0.0793	0.0593
		1:312500	1.4642	1.4743	1.4942	1.4137	0.1294	0.1345	0.1467	0.1335	0.0777	0.0609
		1:1562500	0.9749	0.9212	1.0776	0.8959	0.196	0.1321	0.1071	0.0979	0.0778	0.054
		1:7812500	0.4437	0.4239	0.6248	0.4332	0.155	0.1141	0.0982	0.0962	0.0643	0.0579
		1:39062500	0.2006	0.2031	0.3489	0.2874	0.1718	0.1016	0.1291	0.0915	0.0809	0.0554
		1:1.95E+08	0.1957	0.1613	0.1427	0.134	0.1229	0.1019	0.1177	0.1463	0.0655	0.0538
Raw data of Echis ocellatus
<>	1	2	3	4	5	6	7	8	9	10	11	12
A	0.1813	2.2469	2.2386	2.2277	2.1677	1.9194	1.4276	0.8562	0.3813	0.1887	0.1767	0.1749
B	0.1138	2.2927	2.4978	2.2526	2.3301	1.9077	1.504	0.9334	0.4523	0.2032	0.1242	0.2344
C	0.1333	2.2938	2.2907	2.2725	2.1619	1.9305	1.4291	0.8341	0.3901	0.2235	0.1415	0.1335
D	0.1326	2.3786	2.2262	2.1974	2.1728	2.0101	1.5607	0.9076	0.4242	0.2798	0.1579	0.1841
E	0.1318	0.6554	0.2481	0.2089	0.1179	0.0953	0.1385	0.1615	0.158	0.1501	0.1398	0.1232
F	0.1616	0.5936	0.227	0.1408	0.1132	0.1405	0.0995	0.1373	0.1572	0.1228	0.1121	0.1223
G	0.1321	1.8736	1.6276	1.1779	0.6799	0.3243	0.1554	0.1493	0.1379	0.1349	0.1134	0.107
H	0.1761	1.6674	1.5724	1.0902	0.5134	0.2491	0.1467	0.1269	0.1103	0.1342	0.1033	0.1188
			EAV 1		EAV 2		Normal sheep IgG		SAIMR POLY		Normal Horse IgG
		1:100	2.2469	2.2927	2.2938	2.3786	0.6554	0.5936	1.8736	1.6674	0.0745	0.1012
		1:500	2.2386	2.4978	2.2907	2.2262	0.2481	0.227	1.6276	1.5724	0.0963	0.135
		1:2500	2.2277	2.2526	2.2725	2.1974	0.2089	0.1408	1.1779	1.0902	0.0985	0.1545
		1:12500	2.1677	2.3301	2.1619	2.1728	0.1179	0.1132	0.6799	0.5134	0.1094	0.0632
		1:62500	1.9194	1.9077	1.9305	2.0101	0.0953	0.1405	0.3243	0.2491	0.0793	0.0593
		1:312500	1.4276	1.504	1.4291	1.5607	0.1385	0.0995	0.1554	0.1467	0.0777	0.0609
		1:1562500	0.8562	0.9334	0.8341	0.9076	0.1615	0.1373	0.1493	0.1269	0.0778	0.054
		1:7812500	0.3813	0.4523	0.3901	0.4242	0.158	0.1572	0.1379	0.1103	0.0643	0.0579
		1:39062500	0.1887	0.2032	0.2235	0.2798	0.1501	0.1228	0.1349	0.1342	0.0809	0.0554
		1:1.95E+08	0.1767	0.1242	0.1415	0.1579	0.1398	0.1121	0.1134	0.1033	0.0655	0.0538
Raw data of Callosalesma rhodostoma
<>	1	2	3	4	5	6	7	8	9	10	11	12
A	0.0804	2.1197	1.931	1.7784	1.5229	1.0326	0.4951	0.2537	0.1536	0.0935	0.1099	0.1411
B	0.0957	1.9969	1.8999	1.75	1.4665	1.724	0.423	0.1859	0.5168	0.5137	0.0927	0.138
C	0.0974	1.9768	1.9109	1.785	1.5217	1.221	0.5297	0.6744	0.4853	0.3288	0.1117	0.1234
D	0.0829	1.9309	1.9673	1.7003	1.4811	0.9322	0.4382	0.2146	0.1582	0.3737	0.3437	0.1535
E	0.088	1.053	0.5613	0.2767	0.1423	0.104	0.0805	0.1038	0.1599	0.3812	0.1438	0.1482
F	0.0814	1.0566	0.578	0.2166	0.1615	0.0958	0.0754	0.0686	0.0833	0.0913	0.1074	0.1235
G	0.0897	1.6784	1.2687	0.5366	0.2306	0.1114	0.0852	0.0959	0.0837	0.1147	0.1475	0.1182
H	0.0823	1.7386	1.1354	0.523	0.2017	0.1545	0.1079	0.0957	0.1075	0.1079	0.1157	0.0901
			EAV 1		EAV 2		Normal sheep IgG		SAIMR POLY		Normal Horse IgG
		1:100	2.1197	1.9969	1.9768	1.9309	1.053	1.0566	1.6784	1.7386	0.0745	0.1012
		1:500	1.931	1.8999	1.9109	1.9673	0.5613	0.578	1.2687	1.1354	0.0963	0.135
		1:2500	1.7784	1.75	1.785	1.7003	0.2767	0.2166	0.5366	0.523	0.0985	0.1545
		1:12500	1.5229	1.4665	1.5217	1.4811	0.1423	0.1615	0.2306	0.2017	0.1094	0.0632
		1:62500	1.0326	1.724	1.221	0.9322	0.104	0.0958	0.1114	0.1545	0.0793	0.0593
		1:312500	0.4951	0.423	0.5297	0.4382	0.0805	0.0754	0.0852	0.1079	0.0777	0.0609
		1:1562500	0.2537	0.1859	0.6744	0.2146	0.1038	0.0686	0.0959	0.0957	0.0778	0.054
		1:7812500	0.1536	0.5168	0.4853	0.1582	0.1599	0.0833	0.0837	0.1075	0.0643	0.0579
		1:39062500	0.0935	0.5137	0.3288	0.3737	0.3812	0.0913	0.1147	0.1079	0.0809	0.0554
		1:1.95E+08	0.1099	0.0927	0.1117	0.3437	0.1438	0.1074	0.1475	0.1157	0.0655	0.0538
Raw data of D. acutus
<>	1	2	3	4	5	6	7	8	9	10	11	12
A	0.1391	2.2834	2.4928	2.2896	2.24	2.4351	1.6376	0.9181	0.4607	0.2563	0.1193	0.1405
B	0.2594	2.3823	2.6592	2.3054	2.2498	2.6211	1.6491	1.0667	0.5653	0.2902	0.1072	0.1401
C	0.1594	2.3311	2.2564	2.3047	2.2169	2.1079	1.5717	0.967	0.4744	0.2643	0.1304	0.1384
D	0.183	2.2996	2.4561	2.2555	2.2011	1.9922	1.4699	0.8156	0.3894	0.2305	0.4623	0.1467
E	0.1227	0.5299	0.1898	0.152	0.1118	0.1195	0.098	0.3723	0.4229	0.1012	0.1311	0.1664
F	0.1296	0.5054	0.1908	0.13	0.1182	0.1074	0.249	0.1126	0.1193	0.1144	0.1223	0.1359
G	0.0931	1.6791	1.2954	0.8202	0.3134	0.1625	0.1205	0.1472	0.1278	0.1094	0.1168	0.12
H	0.0992	1.7446	1.2698	0.676	0.3329	0.1543	0.1569	0.1133	0.1091	0.1117	0.1066	0.153
			EAV 1		EAV 2		Normal sheep IgG		SAIMR POLY		Normal Horse IgG
		1:100	2.2834	2.3823	2.3311	2.2996	0.5299	0.5054	1.6791	1.7446	0.0745	0.1012
		1:500	2.4928	2.6592	2.2564	2.4561	0.1898	0.1908	1.2954	1.2698	0.0963	0.135
		1:2500	2.2896	2.3054	2.3047	2.2555	0.152	0.13	0.8202	0.676	0.0985	0.1545
		1:12500	2.24	2.2498	2.2169	2.2011	0.1118	0.1182	0.3134	0.3329	0.1094	0.0632
		1:62500	2.4351	2.6211	2.1079	1.9922	0.1195	0.1074	0.1625	0.1543	0.0793	0.0593
		1:312500	1.6376	1.6491	1.5717	1.4699	0.098	0.249	0.1205	0.1569	0.0777	0.0609
		1:1562500	0.9181	1.0667	0.967	0.8156	0.3723	0.1126	0.1472	0.1133	0.0778	0.054
		1:7812500	0.4607	0.5653	0.4744	0.3894	0.4229	0.1193	0.1278	0.1091	0.0643	0.0579
		1:39062500	0.2563	0.2902	0.2643	0.2305	0.1012	0.1144	0.1094	0.1117	0.0809	0.0554
		1:1.95E+08	0.1193	0.1072	0.1304	0.4623	0.1311	0.1223	0.1168	0.1066	0.0655	0.0538
Raw data of D. typus
<>	1	2	3	4	5	6	7	8	9	10	11	12
A	0.1473	2.2778	2.2587	2.2177	2.05	1.645	1.0855	0.6226	0.4375	0.4035	0.3652	0.158
B	0.1488	2.3278	2.2708	2.2192	2.031	1.594	1.0176	0.5948	0.4184	0.3557	0.3827	0.1867
C	0.176	2.2362	2.2335	2.2389	2.1126	1.7743	1.1975	0.7189	0.5044	0.3864	0.3896	0.1986
D	0.1838	2.1754	2.2171	2.1419	2.0826	1.7052	1.2219	0.7536	0.5048	0.4221	0.3632	0.4879
E	0.1094	1.779	1.4975	0.6253	0.2641	0.1305	0.1301	0.1393	0.1662	0.152	0.1663	0.1113
F	0.1512	1.8138	1.4422	0.6388	0.3024	0.1539	0.1235	0.0996	0.177	0.1351	0.0967	0.165
G	0.2119	2.0449	1.5767	0.9566	0.5426	0.3593	0.3213	0.9867	0.8608	0.9847	0.3467	0.1678
H	0.1943	2.123	1.5857	0.8639	0.4859	0.3779	0.3206	0.3297	0.3261	0.3416	0.3394	0.1506
			EAV 1		EAV 2		Normal sheep IgG		SAIMR POLY		Normal Horse IgG
		1:100	2.2778	2.3278	2.2362	2.1754	1.779	1.8138	2.0449	2.123	0.0745	0.1012
		1:500	2.2587	2.2708	2.2335	2.2171	1.4975	1.4422	1.5767	1.5857	0.0963	0.135
		1:2500	2.2177	2.2192	2.2389	2.1419	0.6253	0.6388	0.9566	0.8639	0.0985	0.1545
		1:12500	2.05	2.031	2.1126	2.0826	0.2641	0.3024	0.5426	0.4859	0.1094	0.0632
		1:62500	1.645	1.594	1.7743	1.7052	0.1305	0.1539	0.3593	0.3779	0.0793	0.0593
		1:312500	1.0855	1.0176	1.1975	1.2219	0.1301	0.1235	0.3213	0.3206	0.0777	0.0609
		1:1562500	0.6226	0.5948	0.7189	0.7536	0.1393	0.0996	0.9867	0.3297	0.0778	0.054
		1:7812500	0.4375	0.4184	0.5044	0.5048	0.1662	0.177	0.8608	0.3261	0.0643	0.0579
		1:39062500	0.4035	0.3557	0.3864	0.4221	0.152	0.1351	0.9847	0.3416	0.0809	0.0554
		1:1.95E+08	0.3652	0.3827	0.3896	0.3632	0.1663	0.0967	0.3467	0.3394	0.0655	0.0538
Raw data of B. arietans
<>	1	2	3	4	5	6	7	8	9	10	11	12
A	0.0865	1.7988	1.8104	1.7122	1.559	1.3146	0.9147	0.4073	0.2692	0.1356	0.0886	0.1255
B	0.1236	1.8357	1.782	1.7223	1.5769	1.3057	0.7834	0.3852	0.1851	0.1364	0.1044	0.2231
C	0.1038	1.8409	1.8848	1.7122	1.7208	1.4128	0.7365	0.3435	0.1807	0.1572	0.1299	0.1004
D	0.1496	1.8125	1.7987	1.7021	1.5878	1.329	0.8488	0.4183	0.2171	0.1673	0.1442	0.1354
E	0.0887	0.4689	0.2053	0.2161	0.1028	0.085	0.1081	0.1162	0.0976	0.1046	0.1016	0.1079
F	0.11	0.4688	0.1565	0.1265	0.1269	0.1158	0.1142	0.1003	0.1004	0.1014	0.0973	0.106
G	0.1013	1.5958	1.5456	1.4449	1.2007	0.6812	0.3103	0.1923	0.1321	0.1258	0.1025	0.1008
H	0.1473	1.5039	1.5448	1.3902	1.043	0.5115	0.2689	0.1566	0.1261	0.1425	0.1342	0.1228
			EAV 1		EAV 2		Normal sheep IgG		SAIMR POLY		Normal Horse IgG
		1:100	1.7988	1.8357	1.8409	1.8125	0.4689	0.4688	1.5958	1.5039	0.0745	0.1012
		1:500	1.8104	1.782	1.8848	1.7987	0.2053	0.1565	1.5456	1.5448	0.0963	0.135
		1:2500	1.7122	1.7223	1.7122	1.7021	0.2161	0.1265	1.4449	1.3902	0.0985	0.1545
		1:12500	1.559	1.5769	1.7208	1.5878	0.1028	0.1269	1.2007	1.043	0.1094	0.0632
		1:62500	1.3146	1.3057	1.4128	1.329	0.085	0.1158	0.6812	0.5115	0.0793	0.0593
		1:312500	0.9147	0.7834	0.7365	0.8488	0.1081	0.1142	0.3103	0.2689	0.0777	0.0609
		1:1562500	0.4073	0.3852	0.3435	0.4183	0.1162	0.1003	0.1923	0.1566	0.0778	0.054
		1:7812500	0.2692	0.1851	0.1807	0.2171	0.0976	0.1004	0.1321	0.1261	0.0643	0.0579
		1:39062500	0.1356	0.1364	0.1572	0.1673	0.1046	0.1014	0.1258	0.1425	0.0809	0.0554
		1:1.95E+08	0.0886	0.1044	0.1299	0.1442	0.1016	0.0973	0.1025	0.1342	0.0655	0.0538
Raw data of D. russelii
<>	1	2	3	4	5	6	7	8	9	10	11	12
A	0.1005	2.2237	2.0909	2.0968	2.0019	1.5179	0.9532	0.5105	0.2713	0.1482	0.0977	0.1257
B	0.1785	2.2471	2.1236	2.0474	1.9632	1.5673	0.9375	0.4324	0.2408	0.1582	0.0991	0.1563
C	0.1139	2.1385	2.1429	2.0701	1.9095	1.4461	1.0066	0.5101	0.2442	0.2206	0.1232	0.1391
D	0.1204	2.1427	2.1575	2.0469	1.9053	1.4764	0.9862	0.4851	0.2784	0.1905	0.129	0.1504
E	0.1418	0.6274	0.241	0.1304	0.1176	0.1471	0.114	0.1466	0.1443	0.1173	0.1117	0.1367
F	0.1476	0.6131	0.2149	0.141	0.1358	0.1155	0.1189	0.1415	0.1078	0.1042	0.1019	0.1156
G	0.2137	1.6357	1.3518	0.8108	0.4461	0.1902	0.126	0.1083	0.1102	0.1153	0.1068	0.1039
H	0.1295	1.6636	1.3153	0.8437	0.3729	0.2128	0.1127	0.1449	0.1216	0.1197	0.1262	0.1198
			EAV 1		EAV 2		Normal sheep IgG		SAIMR POLY		Normal Horse IgG
		1:100	2.2237	2.2471	2.1385	2.1427	0.6274	0.6131	1.6357	1.6636	0.0745	0.1012
		1:500	2.0909	2.1236	2.1429	2.1575	0.241	0.2149	1.3518	1.3153	0.0963	0.135
		1:2500	2.0968	2.0474	2.0701	2.0469	0.1304	0.141	0.8108	0.8437	0.0985	0.1545
		1:12500	2.0019	1.9632	1.9095	1.9053	0.1176	0.1358	0.4461	0.3729	0.1094	0.0632
		1:62500	1.5179	1.5673	1.4461	1.4764	0.1471	0.1155	0.1902	0.2128	0.0793	0.0593
		1:312500	0.9532	0.9375	1.0066	0.9862	0.114	0.1189	0.126	0.1127	0.0777	0.0609
		1:1562500	0.5105	0.4324	0.5101	0.4851	0.1466	0.1415	0.1083	0.1449	0.0778	0.054
		1:7812500	0.2713	0.2408	0.2442	0.2784	0.1443	0.1078	0.1102	0.1216	0.0643	0.0579
		1:39062500	0.1482	0.1582	0.2206	0.1905	0.1173	0.1042	0.1153	0.1197	0.0809	0.0554
		1:1.95E+08	0.0977	0.0991	0.1232	0.129	0.1117	0.1019	0.1068	0.1262	0.0655	0.0538
Raw data of E. carinatus
<>	1	2	3	4	5	6	7	8	9	10	11	12
A	0.2225	2.0455	2.0411	2.0019	2.014	1.7884	1.4625	1.0353	0.5421	0.2989	0.1277	0.1142
B	0.1073	2.1298	2.1069	2.0223	2.0215	1.8099	1.4011	0.86	0.4471	0.2417	0.3202	0.1006
C	0.1297	2.0998	2.0343	2.0142	2.9004	1.7821	1.3408	0.7577	0.3182	0.6984	0.1281	0.5114
D	0.1332	2.1575	2.0709	2.0243	1.9995	1.8194	1.5094	0.9666	0.9968	0.7052	0.6337	0.1878
E	0.134	0.4793	0.2492	0.1611	0.171	0.0977	0.0958	0.1126	0.1374	0.0997	0.1101	0.1468
F	0.1405	0.4505	0.1895	0.1285	0.1242	0.1121	0.0981	0.0938	0.0938	0.1069	0.0945	0.1051
G	0.0969	1.7293	1.6616	1.346	0.8805	0.4232	0.151	0.1119	0.0936	0.0855	0.0832	0.0868
H	0.1391	1.7717	1.4041	1.297	0.8464	0.3661	0.1513	0.1036	0.0935	0.1108	0.1046	0.113
			EAV 1		EAV 2		Normal sheep IgG		SAIMR POLY		Normal Horse IgG
		1:100	2.0455	2.1298	2.0998	2.1575	0.4793	0.4505	1.7293	1.7717	0.0745	0.1012
		1:500	2.0411	2.1069	2.0343	2.0709	0.2492	0.1895	1.6616	1.4041	0.0963	0.135
		1:2500	2.0019	2.0223	2.0142	2.0243	0.1611	0.1285	1.346	1.297	0.0985	0.1545
		1:12500	2.014	2.0215	2.9004	1.9995	0.171	0.1242	0.8805	0.8464	0.1094	0.0632
		1:62500	1.7884	1.8099	1.7821	1.8194	0.0977	0.1121	0.4232	0.3661	0.0793	0.0593
		1:312500	1.4625	1.4011	1.3408	1.5094	0.0958	0.0981	0.151	0.1513	0.0777	0.0609
		1:1562500	1.0353	0.86	0.7577	0.9666	0.1126	0.0938	0.1119	0.1036	0.0778	0.054
		1:7812500	0.5421	0.4471	0.3182	0.9968	0.1374	0.0938	0.0936	0.0935	0.0643	0.0579
		1:39062500	0.2989	0.2417	0.6984	0.7052	0.0997	0.1069	0.0855	0.1108	0.0809	0.0554
		1:1.95E+08	0.1277	0.3202	0.1281	0.6337	0.1101	0.0945	0.0832	0.1046	0.0655	0.0538
Raw data of R. sub
<>	1	2	3	4	5	6	7	8	9	10	11	12
A	0.0874	2.089	2.0127	1.989	1.7425	1.3493	0.8412	0.5404	0.3293	0.3914	0.3295	0.1133
B	0.0924	2.0401	1.9963	1.9233	1.7305	1.2612	0.7647	0.4814	0.3362	0.3149	0.293	0.3918
C	0.0947	2.0734	2.0401	2.0132	1.9062	2.1303	1.2866	0.7108	0.4211	0.5994	0.2994	0.1755
D	0.162	2.0646	2.1486	1.9926	2.6876	1.6302	1.2286	1.1457	0.8211	0.6278	0.7051	0.1554
E	0.1458	1.7422	1.5314	1.0557	0.4228	0.185	0.1327	0.4298	0.4453	0.162	0.5487	0.1651
F	0.1091	1.7439	1.4855	0.9497	0.447	0.1848	0.1233	0.1422	0.1002	0.0992	0.1049	0.1362
G	0.1631	2.0177	1.6789	1.0739	0.5737	0.3358	0.2893	0.2707	0.329	0.2893	0.3064	0.1243
H	0.0856	1.935	1.5515	0.9478	0.4912	0.3232	0.2835	0.2691	0.267	0.2642	0.2682	0.102
			EAV 1		EAV 2		Normal sheep IgG		SAIMR POLY		Normal Horse IgG
		1:100	2.089	2.0401	2.0734	2.0646	1.7422	1.7439	0.6554	0.5936	0.0745	0.1012
		1:500	2.0127	1.9963	2.0401	2.1486	1.5314	1.4855	0.2481	0.227	0.0963	0.135
		1:2500	1.989	1.9233	2.0132	1.9926	1.0557	0.9497	0.2089	0.1408	0.0985	0.1545
		1:12500	1.7425	1.7305	1.9062	1.9062	0.4228	0.447	0.1179	0.1132	0.1094	0.0632
		1:62500	1.3493	1.2612	1.6302	1.6302	0.185	0.1848	0.0953	0.1405	0.0793	0.0593
		1:312500	0.8412	0.7647	1.2866	1.2286	0.1327	0.1233	0.1385	0.0995	0.0777	0.0609
		1:1562500	0.5404	0.4814	1.1401	1.1457	0.1422	0.1422	0.1615	0.1373	0.0778	0.054
		1:7812500	0.4375	0.4184	0.5044	0.5048	0.152	0.1351	0.1662	0.177	0.0643	0.0579
		1:39062500	0.4035	0.3557	0.3864	0.4221	0.0967	0.0967	0.152	0.1351	0.0809	0.0554
		1:1.95E+08	0.3652	0.3827	0.3896	0.3632	0.0967	0.0967	0.1663	0.0967	0.0655	0.0538
Raw data of T. albo
<>	1	2	3	4	5	6	7	8	9	10	11	12
A	0.1654	2.0316	1.9547	1.9192	1.831	1.5495	1.0353	0.6312	0.4737	0.3445	0.3332	0.2142
B	0.148	1.9967	1.9858	1.8763	1.7958	1.5018	0.9975	0.6045	1.1994	0.8981	0.6525	0.5779
C	0.1521	2.082	2.0299	1.9365	1.8385	1.5718	1.0845	0.6488	0.4399	0.3618	0.3173	0.1922
D	0.1332	2.7644	1.9832	1.8768	1.8112	2.323	1.0048	0.5968	0.3911	0.3377	0.3532	0.9175
E	0.3026	2.13	2.0316	0.7919	0.3074	0.1616	0.1072	0.1079	0.1106	0.1519	0.1605	0.107
F	0.0938	1.6682	1.463	0.8058	0.378	0.1577	0.1192	0.1012	0.1379	0.1279	0.112	0.2387
G	0.2017	1.8701	1.6984	1.0255	0.6094	0.4119	0.3841	0.3345	0.6296	0.3194	0.5799	0.1389
H	0.1478	1.8998	1.6124	0.924	0.4949	0.3579	0.3959	0.3449	0.312	0.3434	0.3379	0.1219
Raw data of C. atrox
<>	1	2	3	4	5	6	7	8	9	10	11	12
A	0.1048	2.5862	2.4809	2.5454	2.6778	2.3153	2.0301	1.1094	0.4803	0.2324	0.1808	0.1204
B	0.106	2.4827	2.7006	2.4305	2.4096	2.2234	1.8199	1.2079	0.597	0.2903	0.1636	0.1312
C	0.1348	2.5193	2.4699	2.4793	2.397	2.2508	1.8423	1.0142	0.4356	0.226	0.1447	0.1319
D	0.1201	2.4944	2.4919	2.4747	2.3688	2.2048	1.783	0.9635	0.4655	0.2583	0.1267	0.1517
E	0.113	0.1493	0.1092	0.1075	0.1114	0.1334	0.1253	0.1122	0.1092	0.1421	0.1723	0.1443
F	0.1122	0.0963	0.0959	0.1032	0.1033	0.116	0.1111	0.1261	0.098	0.1007	0.0978	0.1143
G	0.1033	1.8919	1.523	0.9821	0.4331	0.1785	0.1108	0.099	0.1126	0.1115	0.0925	0.0952
H	0.0985	1.9128	1.5808	1.0491	0.4473	0.1993	0.1224	0.0977	0.1171	0.0946	0.1002	0.0958
			EAV 1		EAV 2		Normal sheep IgG		SAIMR POLY		Normal Horse IgG
		1:100	2.5862	2.4827	2.5193	2.4944	1.8919	1.9128	0.1493	0.0963	0.0745	0.1012
		1:500	2.4809	2.7006	2.4699	2.4919	1.523	1.5808	0.1092	0.0959	0.0963	0.135
		1:2500	2.5454	2.4305	2.4793	2.4747	0.9821	1.0491	0.1075	0.1032	0.0985	0.1545
		1:12500	2.6778	2.4096	2.397	2.3688	0.4331	0.4473	0.1114	0.1033	0.1094	0.0632
		1:62500	2.3153	2.2234	2.2508	2.2048	0.1785	0.1993	0.1334	0.116	0.0793	0.0593
		1:312500	2.0301	1.8199	1.8423	1.783	0.1108	0.1224	0.1253	0.1111	0.0777	0.0609
		1:1562500	1.1094	1.2079	1.0142	0.9635	0.099	0.0977	0.1122	0.1261	0.0778	0.054
		1:7812500	0.4803	0.597	0.4356	0.4655	0.1126	0.1171	0.1092	0.098	0.0643	0.0579
		1:39062500	0.2324	0.2903	0.226	0.2583	0.1115	0.0946	0.1421	0.1007	0.0809	0.0554
		1:1.95E+08	0.1808	0.1636	0.1447	0.1267	0.0925	0.1002	0.1723	0.0978	0.0655	0.0538
Raw data of Immunogen mixture 1
<>	1	2	3	4	5	6	7	8	9	10	11	12
A	0.2301	2.4268	2.5106	2.4061	2.3269	2.2161	1.5653	0.8024	0.3146	0.1679	0.0931	0.0962
B	0.1129	2.3575	2.4113	2.3894	2.3096	2.126	1.7055	1.0018	0.4258	0.2181	0.0915	0.1328
C	0.1119	2.3242	2.3683	2.3344	2.2857	2.1142	1.6779	1.0157	0.4028	0.1821	0.104	0.108
D	0.1094	2.3261	2.3294	2.3589	2.267	2.1102	1.7061	1.1527	0.5688	0.2654	0.1104	0.122
E	0.1401	1.5245	1.3664	1.1232	0.7725	0.4109	0.2237	0.1327	0.1145	0.0967	0.0928	0.1191
F	0.1258	1.423	1.27	1.1177	0.7461	0.3746	0.2003	0.1234	0.1025	0.1324	0.1136	0.0966
G	0.1065	0.1493	0.1092	0.1075	0.1114	0.1334	0.1253	0.1122	0.1092	0.1421	0.1723	0.1368
H	0.1072	0.0963	0.0959	0.1032	0.1033	0.116	0.1111	0.1261	0.098	0.1007	0.0978	0.0976
			EAV 1		EAV 2		Normal sheep IgG		SAIMR POLY		Normal Horse IgG
		1:100	2.4268	2.3575	2.3242	2.3261	1.5245	1.423	0.1493	0.0963	0.0745	0.1012
		1:500	2.5106	2.4113	2.3683	2.3294	1.3664	1.27	0.1092	0.0959	0.0963	0.135
		1:2500	2.4061	2.3894	2.3344	2.3589	1.1232	1.1177	0.1075	0.1032	0.0985	0.1545
		1:12500	2.3269	2.3096	2.2857	2.267	0.7725	0.7461	0.1114	0.1033	0.1094	0.0632
		1:62500	2.2161	2.126	2.1142	2.1102	0.4109	0.3746	0.1334	0.116	0.0793	0.0593
		1:312500	1.5653	1.7055	1.6779	1.7061	0.2237	0.2003	0.1253	0.1111	0.0777	0.0609
		1:1562500	0.8024	1.0018	1.0157	1.1527	0.1327	0.1234	0.1122	0.1261	0.0778	0.054
		1:7812500	0.3146	0.4258	0.4028	0.5688	0.1145	0.1025	0.1092	0.098	0.0643	0.0579
		1:39062500	0.1679	0.2181	0.1821	0.2654	0.0967	0.1324	0.1421	0.1007	0.0809	0.0554
		1:1.95E+08	0.0931	0.0915	0.104	0.1104	0.0928	0.1136	0.1723	0.0978	0.0655	0.0538
Raw data of Immunogen mixture 2
<>	1	2	3	4	5	6	7	8	9	10	11	12
A	0.1181	3.0225	3.1474	3.22	2.9903	2.9603	2.402	1.3743	0.6301	0.3126	0.1311	0.1383
B	0.1562	2.945	3.0384	3.0747	3.0472	2.9245	2.6511	1.2137	0.6055	0.3936	0.1291	0.1657
C	0.1998	2.9815	3.0384	3.0213	2.938	2.6474	1.9244	0.8923	0.3672	0.1738	0.1054	0.1491
D	0.1199	2.9573	3.0267	3.0351	2.9573	2.4922	1.56	0.7748	0.2229	0.1339	0.1033	0.1553
E	0.1148	1.8319	1.6809	1.4015	0.9148	0.4346	0.2056	0.1948	0.124	0.1264	0.1298	0.1388
F	0.1232	1.8533	1.6211	1.4079	0.8923	0.4833	0.2497	0.2079	0.1818	0.1972	0.1611	0.1106
G	0.1144	0.1493	0.1092	0.1075	0.1114	0.1334	0.1253	0.1122	0.1092	0.1421	0.1723	0.1041
H	0.1109	0.0963	0.0959	0.1032	0.1033	0.116	0.1111	0.1261	0.098	0.1007	0.0978	0.102
			EAV 1		EAV 2		Normal sheep IgG		SAIMR POLY		Normal Horse IgG
		1:100	3.0225	2.945	2.9815	2.9573	1.8319	1.8533	0.1493	0.0963	0.0745	0.1012
		1:500	3.1474	3.0384	3.0384	3.0267	1.6809	1.6211	0.1092	0.0959	0.0963	0.135
		1:2500	3.22	3.0747	3.0213	3.0351	1.4015	1.4079	0.1075	0.1032	0.0985	0.1545
		1:12500	2.9903	3.0472	2.938	2.9573	0.9148	0.8923	0.1114	0.1033	0.1094	0.0632
		1:62500	2.9603	2.9245	2.6474	2.4922	0.4346	0.4833	0.1334	0.116	0.0793	0.0593
		1:312500	2.402	2.6511	1.9244	1.56	0.2056	0.2497	0.1253	0.1111	0.0777	0.0609
		1:1562500	1.3743	1.2137	0.8923	0.7748	0.1948	0.2079	0.1122	0.1261	0.0778	0.054
		1:7812500	0.6301	0.6055	0.3672	0.2229	0.124	0.1818	0.1092	0.098	0.0643	0.0579
		1:39062500	0.3126	0.3936	0.1738	0.1339	0.1264	0.1972	0.1421	0.1007	0.0809	0.0554
		1:1.95E+08	0.1311	0.1291	0.1054	0.1033	0.1298	0.1611	0.1723	0.0978	0.0655	0.0538
summary of the immunological binding observed between the two EAVs and the individual venoms and venom immunogen mixtures measured by end-point titration ELISA
End-point titration (1:1562500)
	EAV 1		EAV 2		SAIMR POLY		Normal sheep IgG		Normal Horse IgG
B.asper	0.9526	1.1182	1.0202	0.9108	0.1025	0.1182	0.1071	0.1458	0.0778	0.054
B. jararca	0.9749	0.9212	1.0776	0.8959	0.1071	0.0979	0.196	0.1321	0.0778	0.054
E. ocellatus	0.8562	0.9334	0.8341	0.9076	0.1493	0.1269	0.1615	0.1373	0.0778	0.054
C. rhodostoma	0.2537	0.1859	0.2744	0.2146	0.0959	0.0957	0.1038	0.0686	0.0778	0.054
D.typus	0.6226	0.5948	0.7189	0.7536	0.1662	0.177	0.1393	0.0996	0.0778	0.054
D. acutus	0.9181	1.0667	0.967	0.8156	0.1472	0.1133	0.3723	0.1126	0.0778	0.054
D.russelii	0.5105	0.4324	0.5101	0.4851	0.1083	0.1449	0.1466	0.1415	0.0778	0.054
B .arietans	0.4073	0.3852	0.3435	0.4183	0.1162	0.1003	0.1923	0.1566	0.0778	0.054
E. carinatus	1.0353	0.86	0.7577	0.9666	0.1119	0.1036	0.1126	0.0938	0.0778	0.054
R. subminiatus	0.5404	0.4814	1.1401	1.1457	0.1422	0.1422	0.1615	0.1373	0.0778	0.054
T.albolabris	0.6312	0.6045	0.6488	0.5968	0.1079	0.1012	0.1466	0.1415	0.0778	0.054
C. atrox	1.1094	1.2079	1.0142	0.9635	0.099	0.0977	0.1122	0.1261	0.0778	0.054
Immunogen mixture 1	0.8024	1.0018	1.0157	1.1527	0.1327	0.1234	0.1122	0.1261	0.0778	0.054
Immunogen mixture 2	1.3743	1.2137	0.8923	0.7748	0.1948	0.2079	0.1122	0.1261	0.0778	0.054

## Sheet: Avidity ELISA
Raw data of B. asper
<>	1	2	3	4	5	6	7	8	9	10	11	12
A	1.6531	1.6173	1.5555	1.4764	1.4764	1.2066	0.9248	0.0553	0.056	0.057	0.0562	0.0576
B	1.6968	1.6274	1.5204	1.4696	1.4696	1.207	0.9237	0.0434	0.0505	0.0448	0.0459	0.0449
C	1.6663	1.6193	1.5448	1.4972	1.4972	1.3224	1.1912	0.0547	0.0567	0.0527	0.0554	0.0578
D	1.5004	1.5726	1.5521	1.4939	1.4939	1.3519	1.19	0.0514	0.0497	0.0535	0.0455	0.0552
E	0.7696	0.7061	0.4633	0.2856	0.2856	0.1785	0.1209	0.0599	0.0448	0.0581	0.0483	0.0454
F	0.725	0.7122	0.4724	0.2996	0.2996	0.1843	0.1214	0.0505	0.0548	0.0579	0.0495	0.0363
G	0.0982	0.0889	0.0833	0.0825	0.0834	0.0966	0.0868	0.0451	0.0585	0.0571	0.0496	0.0416
H	0.1072	0.1023	0.0948	0.0853	0.0901	0.0846	0.0828	0.0457	0.0442	0.0447	0.0477	0.0435
B. asper
	0M	1M	2M	3M	4M	6M	8M
EAV 1	1.6531	1.6173	1.5555	1.4764	1.4764	1.2066	0.9248
	1.6968	1.6274	1.5204	1.4696	1.4696	1.207	0.9237
EAV 2	1.6663	1.6193	1.5448	1.4972	1.4972	1.3224	1.1912
	1.5004	1.5726	1.5521	1.4939	1.4939	1.3519	1.19
SAIMR POLY	0.7696	0.7061	0.4633	0.2856	0.2856	0.1785	0.1209
	0.725	0.7122	0.4724	0.2996	0.2996	0.1843	0.1214
Normal sheep IgG	0.0982	0.0889	0.0833	0.0825	0.0834	0.0966	0.0868
	0.1072	0.1023	0.0948	0.0853	0.0901	0.0846	0.0828
Normal horse IgG	0.0553	0.056	0.057	0.0562	0.0576	0.0547	0.0567
	0.0434	0.0505	0.0448	0.0459	0.0449	0.0514	0.0497
Raw data of B. jararaca
<>	1	2	3	4	5	6	7	8	9	10	11	12
A	1.7023	1.7254	1.6958	1.6998	1.6922	1.5054	1.362	0.0502	0.0471	0.0476	0.0513	0.0517
B	1.7788	1.7349	1.7002	1.6844	1.6828	1.5352	1.3693	0.0452	0.0435	0.0468	0.0479	0.0476
C	1.7426	1.7323	1.7078	1.6898	1.6705	1.5675	1.5038	0.0532	0.0537	0.0579	0.0495	0.0548
D	1.7023	1.7066	1.721	1.701	1.6998	1.5829	1.4987	0.0462	0.055	0.0571	0.0496	0.0585
E	0.8614	0.7516	0.6001	0.4671	0.3477	0.2154	0.1413	0.0457	0.0435	0.0447	0.0477	0.0442
F	0.8408	0.748	0.6206	0.4665	0.3544	0.2101	0.1358	0.0514	0.0552	0.0535	0.0455	0.0497
G	0.059	0.0581	0.0578	0.0604	0.0567	0.0565	0.0555	0.0434	0.0449	0.0448	0.0459	0.0505
H	0.0689	0.0636	0.0607	0.0591	0.0578	0.0568	0.0572	0.0547	0.0578	0.0527	0.0554	0.0567
B. jararaca
	0M	1M	2M	3M	4M	6M	8 M
EAV 1	1.7023	1.7254	1.6958	1.6998	1.6922	1.5054	1.362
	1.7788	1.7349	1.7002	1.6844	1.6828	1.5352	1.3693
EAV 2	1.7426	1.7323	1.7078	1.6898	1.6705	1.5675	1.5038
	1.7023	1.7066	1.721	1.701	1.6998	1.5829	1.4987
SAIMR POLY	0.8614	0.7516	0.6001	0.4671	0.3477	0.2154	0.1413
	0.8408	0.748	0.6206	0.4665	0.3544	0.2101	0.1358
Normal sheep IgG	0.059	0.0581	0.0578	0.0604	0.0567	0.0565	0.0555
	0.0689	0.0636	0.0607	0.0591	0.0578	0.0568	0.0572
Normal horse IgG	0.0502	0.0471	0.0476	0.0513	0.0517	0.0532	0.0537
	0.0452	0.0435	0.0468	0.0479	0.0476	0.0462	0.055
Raw data of E.ocellatus
<>	1	2	3	4	5	6	7	8	9	10	11	12
A	1.7529	1.7079	1.7	1.6679	1.6492	1.4353	1.2541	0.0467	0.0462	0.0439	0.0634	0.0631
B	1.7333	1.7129	1.6696	1.6913	1.6267	1.4552	1.2443	0.0485	0.0406	0.0468	0.0514	0.05
C	1.695	1.7154	1.6851	1.6445	1.6456	1.5532	1.4958	0.0515	0.0491	0.0495	0.0505	0.0579
D	1.7092	1.7251	1.7867	1.7095	1.7169	1.5541	1.4906	0.0516	0.0515	0.0496	0.0451	0.0571
E	0.9738	0.8923	0.7388	0.5816	0.4631	0.2629	0.1659	0.0552	0.0497	0.0455	0.0514	0.0535
F	1.0125	0.8926	0.7512	0.5995	0.4606	0.2638	0.1591	0.0449	0.0505	0.0459	0.0434	0.0448
G	0.0663	0.0609	0.0599	0.0653	0.0579	0.0559	0.0502	0.0435	0.0442	0.0477	0.0457	0.0447
H	0.0588	0.0575	0.0627	0.0655	0.0574	0.0564	0.0552	0.0578	0.0567	0.0554	0.0547	0.0527
E. ocellatus
	0M	1M	2M	3M	4M	6M	8 M
EAV 1	1.7529	1.7079	1.7	1.6679	1.6492	1.4353	1.2541
	1.7333	1.7129	1.6696	1.6913	1.6267	1.4552	1.2443
EAV 2	1.695	1.7154	1.6851	1.6445	1.6456	1.5532	1.4958
	1.7092	1.7251	1.7867	1.7095	1.7169	1.5541	1.4906
SAIMR POLY	0.9738	0.8923	0.7388	0.5816	0.4631	0.2629	0.1659
	1.0125	0.8926	0.7512	0.5995	0.4606	0.2638	0.1591
Normal sheep IgG	0.0663	0.0609	0.0599	0.0653	0.0579	0.0559	0.0502
	0.0588	0.0575	0.0627	0.0655	0.0574	0.0564	0.0552
Normal horse IgG	0.0467	0.0462	0.0439	0.0634	0.0631	0.0515	0.0491
	0.0485	0.0406	0.0468	0.0514	0.05	0.0516	0.0515
Raw data of C. rhodostoma
<>	1	2	3	4	5	6	7	8	9	10	11	12
A	1.6604	1.5999	1.4966	1.366	1.2358	0.5269	0.2655	0.0489	0.0512	0.0507	0.0504	0.0517
B	1.6893	1.6385	1.5295	1.4241	1.2863	0.5997	0.3046	0.0495	0.0503	0.0503	0.0514	0.0585
C	1.6459	1.6413	1.5485	1.4562	1.3547	0.7841	0.5404	0.0573	0.0595	0.0514	0.0535	0.0497
D	1.6716	1.6213	1.5622	1.4449	1.3487	0.7994	0.5538	0.0558	0.0581	0.0434	0.0448	0.0505
E	0.159	0.1358	0.108	0.0894	0.0848	0.082	0.0829	0.0454	0.0483	0.0509	0.0581	0.0448
F	0.1713	0.1361	0.1091	0.1007	0.0894	0.0747	0.0711	0.0453	0.0425	0.0408	0.0533	0.0445
G	0.0585	0.0571	0.0545	0.0609	0.0602	0.0597	0.057	0.0416	0.0496	0.0451	0.0571	0.0585
H	0.0542	0.0564	0.0563	0.0595	0.0579	0.0601	0.057	0.0552	0.0455	0.0514	0.0515	0.0457
C. rhodostoma
	0M	1M	2M	3M	4M	6M	8 M
EAV 1	1.6604	1.5999	1.4966	1.366	1.2358	0.5269	0.2655
	1.6893	1.6385	1.5295	1.4241	1.2863	0.5997	0.3046
EAV 2	1.6459	1.6413	1.5485	1.4562	1.3547	0.7841	0.5404
	1.6716	1.6213	1.5622	1.4449	1.3487	0.7994	0.5538
SAIMR POLY	0.159	0.1358	0.108	0.0894	0.0848	0.082	0.0829
	0.1713	0.1361	0.1091	0.1007	0.0894	0.0747	0.0711
Normal sheep IgG	0.0585	0.0571	0.0545	0.0609	0.0602	0.0597	0.057
	0.0542	0.0564	0.0563	0.0595	0.0579	0.0601	0.057
Normal horse IgG	0.0489	0.0512	0.0507	0.0504	0.0517	0.0573	0.0595
	0.0495	0.0503	0.0503	0.0514	0.0585	0.0558	0.0581
Raw data of D. typus
<>	1	2	3	4	5	6	7	8	9	10	11	12
A	1.8964	1.9348	1.8379	1.8419	1.8115	1.379	1.0207	0.0515	0.0491	0.0534	0.052	0.0405
B	1.887	1.8381	1.8042	1.7943	1.7416	1.3663	1.0125	0.0516	0.0524	0.0541	0.0551	0.0425
C	1.8042	1.8283	1.8022	1.7933	1.751	1.6145	1.34	0.0505	0.0586	0.0509	0.0581	0.0448
D	1.8553	1.9238	1.9053	1.8538	1.8787	1.6983	1.533	0.0528	0.0545	0.0408	0.0533	0.0445
E	0.6271	0.5486	0.4556	0.328	0.2561	0.1446	0.0893	0.0454	0.0514	0.0535	0.0497	0.0483
F	0.6281	0.5406	0.4347	0.3324	0.2555	0.1388	0.089	0.0453	0.0434	0.0448	0.0505	0.0425
G	0.0605	0.0621	0.064	0.0671	0.0634	0.0626	0.0563	0.0552	0.0514	0.0515	0.0457	0.0455
H	0.062	0.0615	0.0646	0.0651	0.0631	0.0636	0.0602	0.0416	0.0451	0.0571	0.0585	0.0496
D. typus
	0M	1M	2M	3M	4M	6M	8M
EAV 1	1.8964	1.9348	1.8379	1.8419	1.8115	1.379	1.0207
	1.887	1.8381	1.8042	1.7943	1.7416	1.3663	1.0125
EAV 2	1.8042	1.8283	1.8022	1.7933	1.751	1.6145	1.34
	1.8553	1.9238	1.9053	1.8538	1.8787	1.6983	1.533
SAIMR POLY	0.6271	0.5486	0.4556	0.328	0.2561	0.1446	0.0893
	0.6281	0.5406	0.4347	0.3324	0.2555	0.1388	0.089
Normal sheep IgG	0.0605	0.0621	0.064	0.0671	0.0634	0.0626	0.0563
	0.062	0.0615	0.0646	0.0651	0.0631	0.0636	0.0602
Normal horse IgG	0.0515	0.0491	0.0534	0.052	0.0505	0.0586	0.0549
	0.0516	0.0524	0.0541	0.0551	0.0528	0.0545	0.0592
Raw data of D. acutus
<>	1	2	3	4	5	6	7	8	9	10	11	12
A	1.8212	1.8202	1.7552	1.7433	1.7229	1.5332	1.297	0.0542	0.0509	0.0508	0.05	0.0528
B	1.8009	1.805	1.79	1.7565	1.7381	1.5332	1.2977	0.0505	0.0515	0.0515	0.0539	0.0481
C	1.7733	1.7644	1.7866	1.7519	1.731	1.6102	1.5041	0.0561	0.0556	0.0509	0.0448	0.0581
D	1.77	1.7681	1.7525	1.7551	1.7394	1.6245	1.5173	0.0588	0.054	0.0408	0.0445	0.0533
E	0.5028	0.4346	0.3851	0.2546	0.1991	0.1311	0.1013	0.0451	0.0571	0.0496	0.0585	0.0416
F	0.4869	0.4532	0.3517	0.2677	0.2044	0.1285	0.0929	0.0434	0.0448	0.0425	0.0505	0.0453
G	0.069	0.0676	0.0662	0.0639	0.0649	0.0613	0.0564	0.0514	0.0515	0.0455	0.0457	0.0452
H	0.0666	0.0613	0.0635	0.0659	0.064	0.0598	0.0578	0.0514	0.0535	0.0483	0.0497	0.0454
D. acutus
	0M	1M	2M	3M	4M	6M	8M
EAV 1	1.8212	1.8202	1.7552	1.7433	1.7229	1.5332	1.297
	1.8009	1.805	1.79	1.7565	1.7381	1.5332	1.2977
EAV 2	1.7733	1.7644	1.7866	1.7519	1.731	1.6102	1.5041
	1.77	1.7681	1.7525	1.7551	1.7394	1.6245	1.5173
SAIMR POLY	0.5028	0.4346	0.3851	0.2546	0.1991	0.1311	0.1013
	0.4869	0.4532	0.3517	0.2677	0.2044	0.1285	0.0929
Normal sheep IgG	0.069	0.0676	0.0662	0.0639	0.0649	0.0613	0.0564
	0.0666	0.0613	0.0635	0.0659	0.064	0.0598	0.0578
Normal horse IgG	0.0542	0.0509	0.0508	0.05	0.0528	0.0561	0.0556
	0.0505	0.0515	0.0515	0.0539	0.0481	0.0588	0.054
Raw data of D. russelii
<>	1	2	3	4	5	6	7	8	9	10	11	12
A	1.8804	1.9163	1.8817	1.8713	1.7535	1.3767	1.0917	0.0597	0.0568	0.0507	0.0556	0.0525
B	1.8637	1.8567	1.861	1.8064	1.7521	1.3828	1.0882	0.0523	0.0526	0.052	0.0527	0.0585
C	1.8672	1.8492	1.8017	1.7838	1.7707	1.5165	1.3486	0.0594	0.0596	0.0448	0.0581	0.0509
D	1.8732	1.852	1.8083	1.8152	1.7558	1.5395	1.3719	0.0539	0.0581	0.0445	0.0533	0.0408
E	0.573	0.4816	0.3966	0.3064	0.2491	0.161	0.1075	0.0515	0.045	0.0442	0.0445	0.0534
F	0.5524	0.4684	0.3818	0.3098	0.2561	0.1614	0.1101	0.0438	0.0497	0.0454	0.0483	0.0414
G	0.0653	0.0663	0.0689	0.0695	0.0697	0.0656	0.0658	0.0448	0.0533	0.0443	0.0425	0.0439
H	0.0638	0.0789	0.0693	0.0687	0.0667	0.0652	0.066	0.0571	0.0585	0.0436	0.0496	0.0451
D. russelii
	0M	1M	2M	3M	4M	6M	8M
EAV 1	1.8804	1.9163	1.8817	1.8713	1.7535	1.3767	1.0917
	1.8637	1.8567	1.861	1.8064	1.7521	1.3828	1.0882
EAV 2	1.8672	1.8492	1.8017	1.7838	1.7707	1.5165	1.3486
	1.8732	1.852	1.8083	1.8152	1.7558	1.5395	1.3719
SAIMR POLY	0.573	0.4816	0.3966	0.3064	0.2491	0.161	0.1075
	0.5524	0.4684	0.3818	0.3098	0.2561	0.1614	0.1101
Normal sheep IgG	0.0653	0.0663	0.0689	0.0695	0.0697	0.0656	0.0658
	0.0638	0.0789	0.0693	0.0687	0.0667	0.0652	0.066
Normal horse IgG	0.0597	0.0568	0.0507	0.0556	0.0525	0.0594	0.0596
	0.0523	0.0526	0.052	0.0527	0.0585	0.0539	0.0581
Raw data of B. arietans
<>	1	2	3	4	5	6	7	8	9	10	11	12
A	1.5937	1.5569	1.529	1.3985	1.3184	0.6832	0.4168	0.0498	0.0508	0.0493	0.0507	0.0512
B	1.5807	1.5563	1.4705	1.4283	1.2826	0.6701	0.4236	0.0508	0.0505	0.0512	0.0522	0.0534
C	1.5764	1.5689	1.5126	1.4702	1.3897	0.8868	0.613	0.0567	0.0591	0.0581	0.0509	0.0448
D	1.5931	1.5261	1.539	1.4596	1.3861	0.8884	0.6059	0.0514	0.0576	0.0533	0.0408	0.0445
E	1.3182	1.2143	1.1189	0.9849	0.82	0.5323	0.2868	0.0542	0.0555	0.0405	0.0432	0.0571
F	1.308	1.2126	1.112	0.9351	0.8152	0.5192	0.291	0.0438	0.0497	0.0483	0.0414	0.0415
G	0.0755	0.0693	0.0656	0.0714	0.0663	0.0642	0.0737	0.0571	0.0585	0.0496	0.0421	0.0449
H	0.0694	0.0705	0.0703	0.072	0.0692	0.0647	0.0691	0.0488	0.0463	0.0434	0.0429	0.042
B. arietans
	0M	1M	2M	3M	4M	6M	8M
EAV 1	1.5937	1.5569	1.529	1.3985	1.3184	0.6832	0.4168
	1.5807	1.5563	1.4705	1.4283	1.2826	0.6701	0.4236
EAV 2	1.5764	1.5689	1.5126	1.4702	1.3897	0.8868	0.613
	1.5931	1.5261	1.539	1.4596	1.3861	0.8884	0.6059
SAIMR POLY	1.3182	1.2143	1.1189	0.9849	0.82	0.5323	0.2868
	1.308	1.2126	1.112	0.9351	0.8152	0.5192	0.291
Normal sheep IgG	0.0755	0.0693	0.0656	0.0714	0.0663	0.0642	0.0737
	0.0694	0.0705	0.0703	0.072	0.0692	0.0647	0.0691
Normal horse IgG	0.0498	0.0508	0.0493	0.0507	0.0512	0.0567	0.0591
	0.0508	0.0505	0.0512	0.0522	0.0534	0.0514	0.0576
Raw data of E.carinatus
<>	1	2	3	4	5	6	7	8	9	10	11	12
A	2.0724	2.0431	2.0568	2.0676	1.9487	1.4846	1.1232	0.0554	0.0609	0.0568	0.0525	0.0529
B	2.107	2.0891	2.0614	2.0752	1.9989	1.5146	1.1382	0.0525	0.0507	0.0542	0.0553	0.0588
C	2.0658	2.1021	2.0678	2.1237	2.0556	1.8928	1.6998	0.065	0.0626	0.0509	0.0581	0.0448
D	2.0958	2.0764	2.0997	2.0501	2.0448	1.8425	1.6875	0.062	0.0599	0.0408	0.0533	0.0445
E	0.8927	0.8066	0.7086	0.5666	0.4366	0.2349	0.1389	0.0497	0.0504	0.0473	0.0412	0.0532
F	0.9351	0.8388	0.6801	0.587	0.4585	0.2462	0.1389	0.0505	0.0421	0.0496	0.0449	0.0561
G	0.0687	0.0709	0.0734	0.0721	0.0704	0.0681	0.0688	0.0423	0.0529	0.0434	0.042	0.048
H	0.0763	0.0747	0.0718	0.0724	0.0699	0.069	0.0704	0.0445	0.0532	0.0405	0.0531	0.0542
E. carinatus
	0M	1M	2M	3M	4M	6M	8M
EAV 1	2.0724	2.0431	2.0568	2.0676	1.9487	1.4846	1.1232
	2.107	2.0891	2.0614	2.0752	1.9989	1.5146	1.1382
EAV 2	2.0658	2.1021	2.0678	2.1237	2.0556	1.8928	1.6998
	2.0958	2.0764	2.0997	2.0501	2.0448	1.8425	1.6875
SAIMR POLY	0.8927	0.8066	0.7086	0.5666	0.4366	0.2349	0.1389
	0.9351	0.8388	0.6801	0.587	0.4585	0.2462	0.1389
Normal sheep IgG	0.0687	0.0709	0.0734	0.0721	0.0704	0.0681	0.0688
	0.0763	0.0747	0.0718	0.0724	0.0699	0.069	0.0704
Normal horse IgG	0.0554	0.0609	0.0568	0.0525	0.0529	0.065	0.0626
	0.0525	0.0507	0.0542	0.0553	0.0588	0.062	0.0599
Raw data of R. sub
<>	1	2	3	4	5	6	7	8	9	10	11	12
A	1.9782	1.9238	1.852	1.7982	1.7902	1.395	1.1926	0.0532	0.0563	0.0522	0.0525	0.052
B	1.9774	1.9362	1.9087	1.8307	1.7484	1.3734	1.1807	0.0534	0.0513	0.0532	0.0562	0.0563
C	2.0388	2.0449	2.0289	1.9643	1.932	1.7652	1.6675	0.0589	0.058	0.0509	0.0448	0.0581
D	2.0284	2.0197	2.0057	1.9547	1.9238	1.7933	1.6394	0.0621	0.0632	0.0408	0.0445	0.0513
E	0.838	0.713	0.5554	0.4276	0.3361	0.2051	0.134	0.0497	0.0504	0.0473	0.0512	0.0502
F	0.7985	0.7035	0.5402	0.4296	0.3282	0.1994	0.1329	0.0523	0.0427	0.0464	0.0481	0.0426
G	0.0972	0.0829	0.0707	0.0734	0.0693	0.0686	0.0707	0.0435	0.0432	0.0415	0.0442	0.0501
H	0.0961	0.081	0.0756	0.0716	0.0678	0.0687	0.0618	0.0425	0.0421	0.0496	0.0451	0.0409
R. sub.
	0M	1M	2M	3M	4M	6M	8M
EAV 1	1.9782	1.9238	1.852	1.7982	1.7902	1.395	1.1926
	1.9774	1.9362	1.9087	1.8307	1.7484	1.3734	1.1807
EAV 2	2.0388	2.0449	2.0289	1.9643	1.932	1.7652	1.6675
	2.0284	2.0197	2.0057	1.9547	1.9238	1.7933	1.6394
SAIMR POLY	0.838	0.713	0.5554	0.4276	0.3361	0.2051	0.134
	0.7985	0.7035	0.5402	0.4296	0.3282	0.1994	0.1329
Normal sheep IgG	0.0972	0.0829	0.0707	0.0734	0.0693	0.0686	0.0707
	0.0961	0.081	0.0756	0.0716	0.0678	0.0687	0.0618
Normal horse IgG	0.0532	0.0563	0.0522	0.0525	0.052	0.0589	0.058
	0.0534	0.0513	0.0532	0.0562	0.0563	0.0621	0.0632
Raw data of T. albo
<>	1	2	3	4	5	6	7	8	9	10	11	12
A	2.4503	2.452	2.3884	2.3735	2.2709	1.652	1.2528	0.0626	0.0671	0.0613	0.0602	0.0647
B	2.4283	2.4206	2.3903	2.3423	2.2518	1.677	1.2662	0.0576	0.0613	0.0671	0.0713	0.0643
C	2.4261	2.4451	2.4576	2.3831	2.3607	2.1022	1.9124	0.0638	0.0655	0.0509	0.0408	0.0462
D	2.4326	2.4428	2.4062	2.391	2.348	2.0921	1.9001	0.0633	0.0635	0.0408	0.0445	0.0513
E	1.0276	0.9122	0.6656	0.4566	0.3465	0.2233	0.1462	0.053	0.0544	0.0473	0.0512	0.0502
F	1.0322	0.8811	0.6784	0.4619	0.3491	0.2197	0.1507	0.042	0.0427	0.0404	0.0481	0.0436
G	0.0896	0.0846	0.0883	0.0898	0.0804	0.0756	0.0762	0.0565	0.0402	0.0415	0.0442	0.0401
H	0.0895	0.0866	0.0837	0.0847	0.0823	0.0748	0.0758	0.0522	0.052	0.0496	0.0451	0.0509
T. albo.
	0M	1M	2M	3M	4M	6M	8M
EAV 1	2.4503	2.452	2.3884	2.3735	2.2709	1.652	1.2528
	2.4283	2.4206	2.3903	2.3423	2.2518	1.677	1.2662
EAV 2	2.4261	2.4451	2.4576	2.3831	2.3607	2.1022	1.9124
	2.4326	2.4428	2.4062	2.391	2.348	2.0921	1.9001
SAIMR POLY	1.0276	0.9122	0.6656	0.4566	0.3465	0.2233	0.1462
	1.0322	0.8811	0.6784	0.4619	0.3491	0.2197	0.1507
Normal sheep IgG	0.0896	0.0846	0.0883	0.0898	0.0804	0.0756	0.0762
	0.0895	0.0866	0.0837	0.0847	0.0823	0.0748	0.0758
Normal horse IgG	0.0626	0.0671	0.0613	0.0602	0.0647	0.0638	0.0655
	0.0576	0.0613	0.0671	0.0713	0.0643	0.0633	0.0635
Raw data of C. atrox
<>	1	2	3	4	5	6	7	8	9	10	11	12
A	2.2644	2.2202	2.2407	2.2216	2.179	1.8713	1.5563	0.052	0.0485	0.0723	0.0495	0.0562
B	2.2982	2.2653	2.2244	2.2565	2.1529	1.9061	1.57	0.0499	0.0521	0.0534	0.053	0.0629
C	2.2674	2.2623	2.2338	2.2478	2.1814	2.0598	1.9053	0.0591	0.0591	0.0462	0.0509	0.0408
D	2.2571	2.2507	2.2126	2.2058	2.1741	2.0471	1.9099	0.0572	0.0553	0.0513	0.0408	0.0445
E	0.974	0.8477	0.691	0.5209	0.3852	0.2243	0.1405	0.0436	0.0404	0.0441	0.042	0.0427
F	0.9673	0.8577	0.665	0.5191	0.391	0.2229	0.1363	0.0401	0.0415	0.0442	0.0405	0.0402
G	0.0794	0.076	0.0643	0.1118	0.0682	0.0662	0.0789	0.0509	0.0496	0.0551	0.0502	0.052
H	0.0758	0.0729	0.0729	0.0706	0.0717	0.067	0.0685	0.0502	0.0443	0.0512	0.053	0.0444
C. atrox
	0M	1M	2M	3M	4M	6M	8M
EAV 1	2.2644	2.2202	2.2407	2.2216	2.179	1.8713	1.5563
	2.2982	2.2653	2.2244	2.2565	2.1529	1.9061	1.57
EAV 2	2.2674	2.2623	2.2338	2.2478	2.1814	2.0598	1.9053
	2.2571	2.2507	2.2126	2.2058	2.1741	2.0471	1.9099
SAIMR POLY	0.974	0.8477	0.691	0.5209	0.3852	0.2243	0.1405
	0.9673	0.8577	0.665	0.5191	0.391	0.2229	0.1363
Normal sheep IgG	0.0794	0.076	0.0643	0.1118	0.0682	0.0662	0.0789
	0.0758	0.0729	0.0729	0.0706	0.0717	0.067	0.0685
Normal horse IgG	0.052	0.0485	0.0723	0.0495	0.0562	0.0591	0.0591
	0.0499	0.0521	0.0534	0.053	0.0629	0.0572	0.0553
Raw data of Immunogen mixture 1
<>	1	2	3	4	5	6	7	8	9	10	11	12
A	2.4087	2.4319	2.3722	2.2407	2.2898	1.9715	1.6469	0.0617	0.0624	0.0793	0.0791	0.0555
B	2.3945	2.3963	2.3933	2.3428	2.2835	1.948	1.6668	0.0545	0.0549	0.0852	0.0616	0.0631
C	2.3637	2.3903	2.3611	2.3341	2.2804	2.0931	1.9205	0.0621	0.0569	0.0408	0.0509	0.0462
D	2.3769	2.3864	2.345	2.3055	2.314	2.1252	1.9388	0.0567	0.0576	0.0445	0.0408	0.0513
E	0.8617	0.7444	0.6257	0.4352	0.3417	0.2351	0.1547	0.0436	0.0404	0.0427	0.042	0.0441
F	0.8371	0.7663	0.5953	0.456	0.3719	0.2364	0.161	0.0401	0.0415	0.0402	0.0405	0.0442
G	0.1043	0.1012	0.0984	0.095	0.0945	0.0826	0.0825	0.0502	0.0443	0.0444	0.053	0.0512
H	0.0995	0.0979	0.098	0.0954	0.0849	0.083	0.0788	0.0509	0.0496	0.052	0.0502	0.0551
Immunogen mixture 1
	0M	1M	2M	3M	4M	6M	8M
EAV 1	2.4087	2.4319	2.3722	2.2407	2.2898	1.9715	1.6469
	2.3945	2.3963	2.3933	2.3428	2.2835	1.948	1.6668
EAV 2	2.3637	2.3903	2.3611	2.3341	2.2804	2.0931	1.9205
	2.3769	2.3864	2.345	2.3055	2.314	2.1252	1.9388
SAIMR POLY	0.8617	0.7444	0.6257	0.4352	0.3417	0.2351	0.1547
	0.8371	0.7663	0.5953	0.456	0.3719	0.2364	0.161
Normal sheep IgG	0.1043	0.1012	0.0984	0.095	0.0945	0.0826	0.0825
	0.0995	0.0979	0.098	0.0954	0.0849	0.083	0.0788
Normal horse IgG	0.0617	0.0624	0.0793	0.0791	0.0555	0.0621	0.0569
	0.0545	0.0549	0.0852	0.0616	0.0631	0.0567	0.0576
Raw data of Immunogen mixture 2
<>	1	2	3	4	5	6	7	8	9	10	11	12
A	2.3654	2.2961	2.3013	2.245	2.1813	1.8238	1.4893	0.0563	0.0558	0.0554	0.0551	0.0535
B	2.3543	2.3139	2.2811	2.2408	2.174	1.8436	1.4504	0.0707	0.0508	0.073	0.0662	0.0571
C	2.4274	2.2929	2.2589	2.2394	2.2198	2.0102	1.7943	0.0551	0.0596	0.0462	0.0507	0.04
D	2.3279	2.3009	2.2706	2.2243	2.204	2.0102	1.784	0.0588	0.0588	0.0503	0.0408	0.0432
E	1.0654	0.9361	0.7724	0.5851	0.4511	0.2887	0.1861	0.0502	0.0443	0.0512	0.053	0.0444
F	1.0695	0.9432	0.7422	0.5952	0.4615	0.2964	0.1872	0.05	0.0455	0.0451	0.0502	0.052
G	0.1021	0.0916	0.0819	0.0786	0.079	0.0742	0.076	0.0432	0.0414	0.0541	0.042	0.0427
H	0.0956	0.0976	0.0852	0.0795	0.0728	0.0774	0.0765	0.0431	0.0415	0.046	0.0505	0.0502
Immunogen mixture 1
	0M	1M	2M	3M	4M	6M	8M
EAV 1	2.3654	2.2961	2.3013	2.245	2.1813	1.8238	1.4893
	2.3543	2.3139	2.2811	2.2408	2.174	1.8436	1.4504
EAV 2	2.4274	2.2929	2.2589	2.2394	2.2198	2.0102	1.7943
	2.3279	2.3009	2.2706	2.2243	2.204	2.0102	1.784
SAIMR POLY	1.0654	0.9361	0.7724	0.5851	0.4511	0.2887	0.1861
	1.0695	0.9432	0.7422	0.5952	0.4615	0.2964	0.1872
Normal sheep IgG	0.1021	0.0916	0.0819	0.0786	0.079	0.0742	0.076
	0.0956	0.0976	0.0852	0.0795	0.0728	0.0774	0.0765
Normal horse IgG	0.0563	0.0558	0.0554	0.0551	0.0535	0.0551	0.0596
	0.0707	0.0508	0.073	0.0662	0.0571	0.0588	0.0588
Summary of the immunological binding observed between the two EAVs and the individual venoms and venom immunogen mixtures measured by avidity ELISA
	EAV 1		EAV 2		SAIMR POLY		Normal sheep IgG		Normal Horse IgG
B.asper	19.8393	12.1144	9.8459	8.65327	58.9351	57.7454	67.4509	68.488	57.8805	57.1372
B. jararca	10.1939	10.1939	8.16109	5.14135	47.336	49.2738	58.4187	60.609	53.457	57.1372
E. ocellatus	14.695	11.4428	9.89053	8.58944	54.5585	55.9774	72.0476	69.759	70.0453	57.1372
C. rhodostoma	32.3193	35.8866	32.7514	28.6525	61.7166	58.3946	59.6699	57.8027	62.0947	57.1372
D.typus	18.0504	18.5523	11.2946	10.3087	49.6189	57.5123	66.5241	62.708	62.7355	57.1372
D. acutus	10.1939	10.1939	8.16109	5.14135	47.336	49.2738	63.1196	61.9413	59.8811	57.1372
D.russelii	17.0065	13.1367	18.0943	8.34109	60.3573	61.9033	50.7583	60.1714	63.0099	57.1372
B .arietans	22.4231	19.4331	13.4437	10.4503	49.6789	51.9464	36.1411	41.6724	31.8883	57.1372
E. carinatus	14.695	11.4428	9.89053	8.58944	54.5585	55.9774	65.7459	65.3324	57.51	57.1372
R. subminiatus	16.1065	12.8821	8.82996	8.08669	57.9523	63.4599	58.4163	58.3923	60.996	57.1372
T.albolabris	19.6796	16.4639	14.9822	7.35555	64.198	63.6869	58.6551	62.0589	62.855	57.1372
C. atrox	11.8169	8.47227	8.55015	7.59033	56.4878	57.1969	64.0079	64.3202	64.9086	57.1372
Immunogen mixture 1	8.74177	8.79473	8.18328	4.68459	51.4414	57.3172	67.4509	68.488	68.8564	57.1372
Immunogen mixture 2	10.0084	8.19852	4.78931	8.07578	53.3042	54.2309	58.4187	50.7859	53.2205	57.1372

## Sheet: In vitro SVSPs assay
SVSPs assay: in vitro venom activity
	Bothrops asper			Bothrops jararaca			Echis ocellatus			Calloselasma rhodostoma			Dispholidus typus			Deinagkistrodon acutus			Daboia russelii			Bitis arietans			Echis carinatus			Rhabdophis subminiatus			Trimeresurus albolabris			Crotalus atrox			Immunogen mixture I			Immunogen mixture II			Negative
0 min	0.0124	0.0124	0.0124	0.0124	0.0112	0.0115	0	0	0	0	0	0	0	0	0	0	0	0	0	0	0	0.0124	0.0112	0.0115	0.0124	0.0124	0.0124	0	0	0	0.0014	0.0014	0.0014	0	0	0	0.0014	0.0014	0.0014	0.0124	0.0112	0.0115	0	0	0
1 min 1 s	0.015	0.015	0.015	0.0145	0.0126	0.0133	0	0	0	0	0	0	0	0	0	0	0	0	0	0	0	0.0145	0.0126	0.0133	0.015	0.015	0.015	0	0	0	0.0014	0.0014	0.0014	0	0	0	0.0014	0.0014	0.0014	0.0145	0.0126	0.0133	0	0	0
2 min 2 s	0.0174	0.0174	0.0174	0.0167	0.0143	0.0152	0	0	0	0	0	0	0	0	0	0	0	0	0	0	0	0.0167	0.0143	0.0152	0.0174	0.0174	0.0174	0	0	0	0.0014	0.0014	0.0014	0	0	0	0.0014	0.0014	0.0014	0.0167	0.0143	0.0152	0	0	0
3 min 3 s	0.0198	0.0198	0.0198	0.0192	0.0161	0.0173	0.0014	0.0014	0.0014	0	0	0	0	0	0	0	0	0	0	0	0	0.0192	0.0161	0.0173	0.0198	0.0198	0.0198	0	0	0	0.0114	0.0112	0.0115	0.0014	0.0014	0.0014	0.0124	0.0112	0.0115	0.0192	0.0161	0.0173	0	0	0
4 min 4 s	0.0223	0.0223	0.0223	0.0215	0.0177	0.0193	0.0014	0.0014	0.0014	0.0014	0.0014	0.0014	0.0014	0.0014	0.0014	0.0014	0.0014	0.0014	0.0014	0.0014	0.0014	0.0215	0.0177	0.0193	0.0223	0.0223	0.0223	0.0014	0.0014	0.0014	0.0014	0.0014	0.0014	0.0014	0.0014	0.0014	0.0145	0.0126	0.0133	0.0215	0.0177	0.0193	0	0	0
5 min 5 s	0.0248	0.0258	0.0268	0.0239	0.0195	0.0212	0.0014	0.0014	0.0014	0.0014	0.0014	0.0014	0.0014	0.0014	0.0014	0.0014	0.0014	0.0014	0.0014	0.0014	0.0014	0.0239	0.0195	0.0212	0.0248	0.0258	0.0268	0.0014	0.0014	0.0014	0.0014	0.0014	0.0014	0.0014	0.0014	0.0014	0.0167	0.0143	0.0152	0.0239	0.0195	0.0212	0	0	0
6 min 6 s	0.0272	0.0282	0.0286	0.0266	0.0213	0.0234	0.0124	0.0112	0.0115	0.0014	0.0014	0.0014	0.0014	0.0014	0.0014	0.0024	0.0024	0.0024	0.0014	0.0014	0.0014	0.0266	0.0213	0.0234	0.0272	0.0282	0.0286	0.0014	0.0014	0.0014	0.0014	0.0014	0.0014	0.0124	0.0112	0.0115	0.0192	0.0161	0.0173	0.0266	0.0213	0.0234	0	0	0
7 min 7 s	0.0304	0.0307	0.0305	0.0291	0.0234	0.0256	0.0145	0.0126	0.0133	0.0015	0.0015	0.0015	0.0015	0.0015	0.0015	0.0024	0.0024	0.0024	0.0014	0.0014	0.0014	0.0291	0.0234	0.0256	0.0304	0.0307	0.0305	0.0014	0.0014	0.0014	0.0014	0.0014	0.0014	0.0145	0.0126	0.0133	0.0215	0.0177	0.0649	0.0291	0.0234	0.0256	0	0	0
8 min 8 s	0.033	0.038	0.039	0.029	0.0254	0.0279	0.0167	0.0143	0.0152	0.0015	0.0015	0.0015	0.0015	0.0015	0.0015	0.0035	0.0035	0.0035	0.0014	0.0014	0.0014	0.029	0.0254	0.0279	0.033	0.038	0.039	0.0014	0.0014	0.0014	0.0114	0.0112	0.0115	0.0167	0.0143	0.0152	0.0239	0.0195	0.0665	0.029	0.0254	0.0279	0	0	0
9 min 9 s	0.0354	0.0359	0.036	0.0304	0.0303	0.0302	0.0192	0.0161	0.0173	0.0015	0.0015	0.0015	0.0015	0.0015	0.0015	0.0035	0.0035	0.0035	0.0014	0.0014	0.0014	0.0304	0.0303	0.0302	0.0354	0.0359	0.036	0.0014	0.0014	0.0014	0.0014	0.0014	0.0014	0.0192	0.0161	0.0173	0.0266	0.0213	0.0669	0.0304	0.0303	0.0302	0	0	0
10 min 10 s	0.0376	0.038	0.0386	0.0373	0.0365	0.0366	0.0215	0.0177	0.0649	0.0024	0.0024	0.0024	0.0024	0.0024	0.0024	0.0035	0.0035	0.0035	0.0014	0.0014	0.0014	0.0373	0.0365	0.0366	0.0376	0.038	0.0386	0.0014	0.0014	0.0014	0.0014	0.0014	0.0014	0.0215	0.0177	0.0649	0.0291	0.0234	0.0679	0.0373	0.0365	0.0366	0	0	0
11 min 11 s	0.0413	0.0419	0.042	0.0402	0.0404	0.0404	0.0239	0.0195	0.0665	0.0024	0.0024	0.0024	0.0024	0.0024	0.0024	0.0045	0.0045	0.0045	0.0014	0.0014	0.0014	0.0402	0.0404	0.0404	0.0413	0.0419	0.042	0.0014	0.0014	0.0014	0.0014	0.0014	0.0014	0.0239	0.0195	0.0665	0.029	0.0254	0.0689	0.0402	0.0404	0.0404	0	0	0
12 min 12 s	0.0445	0.0435	0.0448	0.0411	0.041	0.042	0.0266	0.0213	0.0669	0.0035	0.0035	0.0035	0.0035	0.0035	0.0035	0.0045	0.0045	0.0045	0.0015	0.0015	0.0015	0.0411	0.041	0.042	0.0445	0.0435	0.0448	0.0015	0.0015	0.0015	0.0114	0.0112	0.0115	0.0266	0.0213	0.0669	0.0304	0.0303	0.0709	0.0411	0.041	0.042	0	0	0
13 min 13 s	0.0474	0.047	0.0469	0.0418	0.0419	0.0413	0.0291	0.0234	0.0679	0.0035	0.0035	0.0035	0.0035	0.0035	0.0035	0.0065	0.0065	0.0065	0.0015	0.0015	0.0015	0.0418	0.0419	0.0413	0.0474	0.047	0.0469	0.0015	0.0015	0.0015	0.0125	0.0126	0.0133	0.0291	0.0234	0.0679	0.0304	0.0303	0.0715	0.0418	0.0419	0.0413	0	0	0
14 min 14 s	0.0504	0.0511	0.0508	0.0423	0.0424	0.0423	0.029	0.0254	0.0689	0.0035	0.0035	0.0035	0.0035	0.0035	0.0035	0.0075	0.0075	0.0075	0.0015	0.0015	0.0015	0.0423	0.0424	0.0423	0.0504	0.0511	0.0508	0.0015	0.0015	0.0015	0.0147	0.0143	0.0152	0.029	0.0254	0.0689	0.0304	0.0303	0.0753	0.0423	0.0424	0.0423	0	0	0
15 min 15 s	0.0524	0.0517	0.0519	0.0427	0.0427	0.0429	0.0304	0.0303	0.0709	0.0035	0.0035	0.0035	0.0045	0.0045	0.0045	0.0075	0.0075	0.0075	0.0015	0.0015	0.0015	0.0427	0.0427	0.0429	0.0524	0.0517	0.0519	0.0015	0.0015	0.0015	0.0152	0.0151	0.0153	0.0304	0.0303	0.0709	0.0304	0.0303	0.0753	0.0427	0.0427	0.0429	0	0	0
16 min 16 s	0.0525	0.0529	0.053	0.0525	0.0529	0.053	0.0304	0.0303	0.0715	0.0035	0.0035	0.0035	0.0045	0.0045	0.0045	0.0085	0.0085	0.0085	0.0015	0.0015	0.0015	0.0525	0.0529	0.053	0.0525	0.0529	0.053	0.0015	0.0015	0.0015	0.0152	0.0151	0.0153	0.0304	0.0303	0.0715	0.0304	0.0303	0.0753	0.0525	0.0529	0.053	0	0	0
17 min 17 s	0.0547	0.0549	0.0552	0.0547	0.0549	0.0552	0.0304	0.0303	0.0753	0.0035	0.0035	0.0035	0.0065	0.0065	0.0065	0.0085	0.0085	0.0085	0.0015	0.0015	0.0015	0.0547	0.0549	0.0552	0.0547	0.0549	0.0552	0.0015	0.0015	0.0015	0.01639	0.0165	0.0165	0.0304	0.0303	0.0753	0.0304	0.0303	0.0753	0.0547	0.0549	0.0552	0	0	0
18 min 18 s	0.0555	0.0559	0.056	0.0555	0.0559	0.056	0.0304	0.0303	0.0753	0.0035	0.0035	0.0035	0.0065	0.0065	0.0065	0.0085	0.0085	0.0085	0.0015	0.0015	0.0015	0.0555	0.0559	0.056	0.0555	0.0559	0.056	0.0015	0.0015	0.0015	0.0166	0.0163	0.0169	0.0304	0.0303	0.0753	0.0336	0.0336	0.0336	0.0555	0.0559	0.056	0	0	0
19 min 19 s	0.06	0.0597	0.0599	0.06	0.0597	0.0599	0.0304	0.0303	0.0753	0.0045	0.0045	0.0045	0.0065	0.0065	0.0065	0.0085	0.0085	0.0085	0.0015	0.0015	0.0015	0.06	0.0597	0.0599	0.06	0.0597	0.0599	0.0015	0.0015	0.0015	0.0161	0.0164	0.01679	0.0304	0.0303	0.0753	0.0333	0.0333	0.0333	0.06	0.0597	0.0599	0	0	0
20 min 20 s	0.0605	0.0607	0.0607	0.0605	0.0607	0.0609	0.0304	0.0303	0.0753	0.0045	0.0045	0.0045	0.0075	0.0075	0.0075	0.0095	0.0095	0.0095	0.0015	0.0015	0.0015	0.0605	0.0607	0.0609	0.0605	0.0607	0.0607	0.0015	0.0015	0.0015	0.0169	0.01654	0.01689	0.0304	0.0303	0.0753	0.0333	0.0333	0.0333	0.0605	0.0607	0.0609	0	0	0
21 min 21 s	0.0615	0.0616	0.0619	0.0615	0.0617	0.0619	0.0316	0.0316	0.0316	0.0045	0.0045	0.0045	0.0075	0.0075	0.0075	0.0095	0.0095	0.0095	0.00174	0.00174	0.00174	0.0615	0.0617	0.0619	0.0615	0.0616	0.0619	0.00174	0.00174	0.00174	0.01804	0.01803	0.01809	0.0316	0.0316	0.0316	0.0333	0.0333	0.0333	0.0615	0.0617	0.0619	0	0	0
22 min 22 s	0.0633	0.0636	0.064	0.0643	0.0646	0.0649	0.0313	0.0313	0.0313	0.0045	0.0045	0.0045	0.0075	0.0075	0.0075	0.0115	0.0115	0.0115	0.00174	0.00174	0.00174	0.0643	0.0646	0.0649	0.0633	0.0636	0.064	0.00174	0.00174	0.00174	0.01904	0.01903	0.01915	0.0313	0.0313	0.0313	0.0353	0.0353	0.0353	0.0643	0.0646	0.0649	0	0	0
23 min 23 s	0.065	0.0655	0.0665	0.065	0.0655	0.0665	0.0313	0.0313	0.0313	0.0045	0.0045	0.0045	0.0085	0.0085	0.0085	0.0115	0.0115	0.0115	0.00174	0.00174	0.00174	0.065	0.0655	0.0665	0.065	0.0655	0.0665	0.00174	0.00174	0.00174	0.0266	0.0213	0.0269	0.0313	0.0313	0.0313	0.0353	0.0353	0.0353	0.065	0.0655	0.0665	0	0	0
24 min 24 s	0.0735	0.0737	0.0729	0.0655	0.0667	0.0669	0.0333	0.0333	0.0333	0.0045	0.0045	0.0045	0.0085	0.0085	0.0085	0.0145	0.0145	0.0145	0.00174	0.00174	0.00174	0.0655	0.0667	0.0669	0.0735	0.0737	0.0729	-0.00174	-0.00174	-0.00174	0.0291	0.0234	0.0279	0.0333	0.0333	0.0333	0.0373	0.0373	0.0373	0.0655	0.0667	0.0669	0	0	0
25 min 25 s	0.0745	0.0747	0.0749	0.0675	0.0677	0.0679	0.0343	0.0343	0.0343	0.0045	0.0045	0.0045	0.0085	0.0085	0.0085	0.0155	0.0155	0.0155	0.00174	0.00174	0.00174	0.0675	0.0677	0.0679	0.0745	0.0747	0.0749	-0.00174	-0.00174	-0.00174	0.029	0.0254	0.0289	0.0343	0.0343	0.0343	0.0373	0.0373	0.0373	0.0675	0.0677	0.0679	0	0	0
26 min 26 s	0.0855	0.0855	0.085	0.06885	0.0687	0.0689	0.0343	0.0343	0.0343	0.0045	0.0045	0.0045	0.0085	0.0085	0.0085	0.0175	0.0175	0.0175	0.00174	0.00174	0.00174	0.06885	0.0687	0.0689	0.0855	0.0855	0.085	-0.00174	-0.00174	-0.00174	0.0304	0.0303	0.0309	0.0343	0.0343	0.0343	0.0376	0.0376	0.0376	0.06885	0.0687	0.0689	0	0	0
27 min 27 s	0.0859	0.0858	0.0863	0.0705	0.0707	0.0709	0.0343	0.0343	0.0343	0.0045	0.0045	0.0045	0.0095	0.0095	0.0095	0.0185	0.0185	0.0185	0.00174	0.00174	0.00174	0.0705	0.0707	0.0709	0.0859	0.0858	0.0863	-0.00174	-0.00174	-0.00174	0.0266	0.0213	0.0369	0.0343	0.0343	0.0343	0.0373	0.0373	0.0373	0.0705	0.0707	0.0709	0	0	0
28 min 28 s	0.0996	0.0997	0.0999	0.0735	0.0725	0.0715	0.0343	0.0343	0.0343	0.0045	0.0045	0.0045	0.0095	0.0095	0.0095	0.0195	0.0195	0.0195	0.00174	0.00174	0.00174	0.0735	0.0725	0.0715	0.0996	0.0997	0.0999	-0.00174	-0.00174	-0.00174	0.0291	0.0234	0.0379	0.0343	0.0343	0.0343	0.0373	0.0373	0.0373	0.0735	0.0725	0.0715	0	0	0
29 min 29 s	0.1019	0.11158	0.10063	0.0749	0.0758	0.0753	0.0343	0.0343	0.0343	0.0065	0.0065	0.0065	0.0115	0.0115	0.0115	0.0195	0.0195	0.0195	0.00174	0.00174	0.00174	0.0749	0.0758	0.0753	0.1019	0.11158	0.10063	-0.00174	-0.00174	-0.00174	0.029	0.0254	0.0389	0.0343	0.0343	0.0343	0.0376	0.0376	0.0376	0.0749	0.0758	0.0753	0	0	0
30 min 30 s	0.1296	0.1397	0.1499	0.0806	0.0807	0.0809	0.0343	0.0343	0.0343	0.0065	0.0065	0.0065	0.0115	0.0115	0.0115	0.0195	0.0195	0.0195	0.00174	0.00174	0.00174	0.0806	0.0807	0.0809	0.1296	0.1397	0.1499	-0.00174	-0.00174	-0.00174	0.0304	0.0303	0.0309	0.0343	0.0343	0.0343	0.0413	0.0413	0.0413	0.0806	0.0807	0.0809	0	0	0
SVSPs assay for venoms+antivenoms
	Venom+EAV 1			Venom+EAV 2			Venom+SAIMR polyvalent			Positive			Venom			EAV 1			EAV 2			SAIMR polyvalent			Negative
Bothrops asper	0.0402	0.0412	0.0395	0.0572	0.0566	0.0492	0.0578	0.055	0.0498	0.0656	0.0666	0.0657	0.0524	0.053	0.0536	-0.0008	-0.00085	-0.0007	-0.0006	-0.0005	-0.0055	-0.0014	-0.0015	-0.0016	0.0004	0.0039	0.0045
Bothrops jararca	0.044149	0.039479	0.036123	0.039151	0.04698	0.032965	0.0478	0.035	0.0498	0.0656	0.0666	0.0657	0.0472	0.0366	0.0592	-0.0008	-0.00085	-0.0007	-0.0006	-0.0005	-0.0055	-0.0014	-0.0015	-0.0016	0.0004	0.0039	0.0045
Echis ocellatus	0.022575	0.023746	0.022556	0.001866	0.001756	0.0018	0.016791	0.015791	0.016761	0.0656	0.0666	0.0657	0.028731	0.038732	0.028111	-0.0008	-0.00085	-0.0007	-0.0006	-0.0005	-0.0055	-0.0014	-0.0015	-0.0016	0.0004	0.0039	0.0045
Calloselasma rhodostoma	-0.00168	-0.00158	-0.00148	0.000373	0.000383	0.000299	0.002799	0.002899	0.002999	0.0656	0.0666	0.0657	0.003918	0.003818	0.003718	-0.0008	-0.00085	-0.0007	-0.0006	-0.0005	-0.0055	-0.0014	-0.0015	-0.0016	0.0004	0.0039	0.0045
Dispholidus typus	-0.00112	-0.00142	-0.00122	-0.00168	-0.00188	-0.0017	-0.00112	-0.00102	-0.00114	0.0656	0.0666	0.0657	0.006716	0.006916	0.006716	-0.0008	-0.00085	-0.0007	-0.0006	-0.0005	-0.0055	-0.0014	-0.0015	-0.0016	0.0004	0.0039	0.0045
Deinagkistrodon acutus	-0.00131	-0.00151	-0.00141	-0.00075	-0.00077	-0.00071	0.000746	0.000706	0.000696	0.0656	0.0666	0.0657	0.008209	0.008809	0.008509	-0.0008	-0.00085	-0.0007	-0.0006	-0.0005	-0.0055	-0.0014	-0.0015	-0.0016	0.0004	0.0039	0.0045
Daboia russelii	0.000746	0.000776	0.000726	-0.00149	-0.00179	-0.00189	0.000746	0.00074	0.000796	0.0656	0.0666	0.0657	-0.00075	-0.00077	-0.00079	-0.0008	-0.00085	-0.0007	-0.0006	-0.0005	-0.0055	-0.0014	-0.0015	-0.0016	0.0004	0.0039	0.0045
Bitis arietans	0.013433	0.014433	0.013733	0.036194	0.040194	0.039194	0.010634	0.018634	0.010934	0.0656	0.0666	0.0657	0.034701	0.035701	0.042701	-0.0008	-0.00085	-0.0007	-0.0006	-0.0005	-0.0055	-0.0014	-0.0015	-0.0016	0.0004	0.0039	0.0045
Echis carinatus	0.036567	0.035567	0.035557	0.016045	0.015045	0.016445	0.028545	0.029545	0.027545	0.0656	0.0666	0.0657	0.05056	0.05156	0.05006	-0.0008	-0.00085	-0.0007	-0.0006	-0.0005	-0.0055	-0.0014	-0.0015	-0.0016	0.0004	0.0039	0.0045
Rhabdophis subminiatus	-0.00317	-0.00322	-0.00367	0.004291	0.004991	0.004791	-0.00075	-0.00076	-0.00076	0.0656	0.0666	0.0657	0.00056	0.00066	0.00061	-0.0008	-0.00085	-0.0007	-0.0006	-0.0005	-0.0055	-0.0014	-0.0015	-0.0016	0.0004	0.0039	0.0045
Trimeresurus albolabris	0.001679	0.001979	0.002279	0.002985	0.003085	0.003995	0.008582	0.008982	0.009382	0.0656	0.0666	0.0657	0.020336	0.024336	0.030336	-0.0008	-0.00085	-0.0007	-0.0006	-0.0005	-0.0055	-0.0014	-0.0015	-0.0016	0.0004	0.0039	0.0045
Crotalus atrox	0.022201	0.028201	0.032201	0.011567	0.019567	0.011197	0.014552	0.018552	0.020552	0.0656	0.0666	0.0657	0.026679	0.030679	0.031679	-0.0008	-0.00085	-0.0007	-0.0006	-0.0005	-0.0055	-0.0014	-0.0015	-0.0016	0.0004	0.0039	0.0045
Immunogen mixture 1	0.009328	0.009928	0.009628	0.011381	0.012281	0.010381	0.015858	0.019858	0.020858	0.0656	0.0666	0.0657	0.0317164	0.039716	0.030716	-0.0008	-0.00085	-0.0007	-0.0006	-0.0005	-0.0055	-0.0014	-0.0015	-0.0016	0.0004	0.0039	0.0045
Immunogen mixture 2	0.018097	0.016097	0.013097	0.010634	0.011634	0.015634	0.028731	0.026731	0.024731	0.0656	0.0666	0.0657	0.04347	0.04947	0.04247	-0.0008	-0.00085	-0.0007	-0.0006	-0.0005	-0.0055	-0.0014	-0.0015	-0.0016	0.0004	0.0039	0.0045
Percentage reduction of venom+antivenoms activity
	EAV 1			EAV 2			SAIMR polyvalent
Bothrops asper	23.2824	22.2642	26.306	-9.16031	-6.79245	8.20895	-10.3053	-3.77358	7.08955
Bothrops jararaca	24.2724	25.2343	26.4038	18.202	19.2141	21.437	10.3053	7.77358	7.08955
Echis ocellatus	21.4286	38.6907	19.7632	93.5065	95.4674	93.5966	41.5584	59.2299	40.3762
Bitis arietans	61.2903	59.5736	67.8399	-4.30108	-12.5836	8.21391	69.3548	47.8052	74.3936
Echis carinatus	27.6753	31.0175	28.9705	68.2657	70.8207	67.1497	43.5424	42.6979	44.9761
Trimeresurus albolabris	91.7431	91.8675	92.4871	85.3211	87.3229	86.8305	57.7982	63.0911	69.0726
Crotalus atrox	16.7832	8.07589	-1.649	56.6434	36.2199	64.6558	45.4545	39.5281	35.1237
Immunogen mixture 1	70.5882	75.0019	68.654	64.1176	69.0793	66.205	50	50	32.0943
Immunogen mixture 2	58.3691	67.4612	69.1618	75.5365	76.4821	63.1875	33.9056	45.9647	41.7677

## Sheet: In vitro SVMPs assay
SVMPs assay: in vitro venom activity
	Bothrops asper			Bothrops jararaca			Echis ocellatus			Calloselasma rhodostoma			Dispholidus typus			Deinagkistrodon acutus			Daboia russelii			Bitis arietans			Echis carinatus			Rhabdophis subminiatus			Trimeresurus albolabris			Crotalus atrox			Immunogen mixture I			Immunogen mixture II			Negative
0 min	12525	10573	10689	76596	76843	69632	72664	9872	73165	13858	18129	14440	14674	16221	15798	34656	37972	36883	9199	9433	5929	9995	9719	9080	7844	16873	16761	9024	9004	9023	9199	9433	5929	76596	76843	69632	17313	17356	15059	40680	38778	41477	0	0	0
0 min 40 s	14937	10800	10892	76680	76900	69498	73551	9923	74110	17708	24078	18180	19329	21641	21592	38864	42811	40998	9291	9466	5996	10162	9806	9176	9836	22446	22653	9060	9029	9049	9291	9466	5996	76680	76900	69498	22407	22651	19339	42165	40175	42837	0	0	0
1 min 20 s	17355	11016	11161	76582	76948	69477	74181	9931	74580	20929	29206	21637	23421	26190	26400	42491	47077	44335	9446	9543	6103	10359	10017	9368	11651	27555	27950	9158	9139	9166	9446	9543	6103	76582	76948	69477	26975	27370	23419	43598	41535	44094	0	0	0
2 min	19703	11291	11394	76691	77247	69627	74732	10011	74982	24144	33520	24731	27322	30331	30748	45590	50566	46990	9567	9663	6190	10564	10234	9555	13042	32246	32731	9306	9243	9246	9567	9663	6190	76691	77247	69627	31278	31834	27252	44973	42646	45030	0	0	0
2 min 40 s	21974	11565	11653	76882	77189	69386	74905	9983	75190	27253	37190	27646	31050	34310	35084	48918	53694	49082	9676	9739	6344	10776	10420	9747	14378	36378	37250	9425	9369	9372	9676	9739	6344	76882	77189	69386	35389	35819	30727	46118	43900	46192	0	0	0
3 min 20 s	24196	11854	12051	77071	77353	69460	75049	10022	75256	29881	40617	30175	34507	37845	39112	51346	56258	50705	9784	9825	6428	11009	10686	10007	15493	39996	41298	9534	9516	9491	9784	9825	6428	77071	77353	69460	38881	39451	33940	47505	44827	47342	0	0	0
4 min	26452	12053	12329	76761	77194	69342	74695	10020	75136	32462	43257	32596	37826	40959	42639	53873	58526	52235	9886	9902	6539	11297	10972	10273	16445	43468	45119	9671	9591	9559	9886	9902	6539	76761	77194	69342	42235	42620	37061	48812	45957	48224	0	0	0
4 min 40 s	28629	12305	12622	76955	77344	69501	74636	10032	74947	34577	45972	34823	40696	43549	45771	55909	60557	53504	10014	9947	6651	11524	11223	10491	17336	46464	48349	9761	9650	9586	10014	9947	6651	76955	77344	69501	45067	45548	39770	49837	46739	49070	0	0	0
5 min 20 s	30567	12535	12907	76987	77656	69435	74610	10092	75072	36748	48276	36667	43595	45734	48440	57910	62199	54844	10191	9942	6733	11864	11482	10768	18110	48948	51508	9767	9716	9670	10191	9942	6733	76987	77656	69435	47841	48156	42089	51030	47576	50027	0	0	0
6 min	32766	12777	13200	76554	77373	69235	74761	10108	75112	38574	50247	38145	46129	47696	50892	59710	63751	55862	10302	9983	6842	12164	11737	11015	18596	51201	54244	9849	9796	9731	10302	9983	6842	76554	77373	69235	50243	50494	44412	52057	48423	50587	0	0	0
6 min 40 s	34903	13013	13471	76827	76911	69115	74929	10134	75084	40281	52246	39801	48666	49086	53052	61268	65226	56448	10397	10055	6921	12440	12055	11291	19231	53296	56650	9935	9896	9764	10397	10055	6921	76827	76911	69115	52498	52724	46469	53102	49413	51218	0	0	0
7 min 20 s	36996	13323	13712	76701	77115	69141	74681	10086	75036	42087	53572	41387	50851	50664	55286	62407	66555	57147	10547	10036	7034	12740	12302	11547	19710	55120	59192	10012	10005	9908	10547	10036	7034	76701	77115	69141	54622	54716	48434	53989	50042	51975	0	0	0
8 min	39022	13594	14030	76474	77244	69324	74487	10135	75162	43458	55348	42630	53102	52135	57243	63459	67406	57380	10683	10106	7133	13074	12591	11858	20156	56818	61542	10125	10061	10003	10683	10106	7133	76474	77244	69324	56422	56377	50305	54858	50792	52547	0	0	0
8 min 40 s	41177	13857	14296	76667	77395	69274	74404	10188	75137	44881	56509	43830	55142	53809	59142	64330	68405	57864	10777	10144	7213	13391	12947	12175	20561	58665	63524	10269	10220	10072	10777	10144	7213	76667	77395	69274	58218	58331	52155	55881	51367	53213	0	0	0
9 min 20 s	43094	14084	14555	76520	77399	69215	74810	10164	75109	46188	57413	44828	56902	54820	60847	65497	69143	58424	10941	10153	7337	13712	13292	12475	20888	59834	65562	10323	10316	10129	10941	10153	7337	76520	77399	69215	59712	59827	54001	56681	51959	53649	0	0	0
10 min	45080	14298	14859	76605	77060	68850	74612	10164	75258	47492	58448	45970	59143	56030	62470	66350	69669	58746	11090	10160	7397	14019	13586	12749	21131	61192	67270	10462	10388	10206	11090	10160	7397	76605	77060	68850	61027	61177	55415	57381	52609	54258	0	0	0
10 min 40 s	47159	14582	15090	76434	77364	69116	74509	10174	75277	48358	59107	46737	60901	57053	63869	67143	70244	59148	11175	10215	7465	14354	13953	13086	21353	62468	68988	10568	10541	10352	11175	10215	7465	76434	77364	69116	62451	62290	56903	58040	52944	54503	0	0	0
11 min 20 s	48991	14755	15380	76162	77210	68760	74880	10194	75230	49364	59702	47542	62760	58142	65174	67616	70813	59223	11300	10224	7560	14701	14219	13405	21572	63580	70513	10698	10652	10415	11300	10224	7560	76162	77210	68760	63516	63490	58090	58698	53476	55147	0	0	0
12 min	50990	14966	15667	76464	76579	69006	74595	10190	75106	50029	60473	48364	64299	59028	66200	68145	71342	59493	11392	10290	7651	15047	14561	13736	21653	64674	71870	10826	10740	10534	11392	10290	7651	76464	76579	69006	64585	64602	59218	59072	53891	55592	0	0	0
12 min 40 s	52890	15216	15906	76467	76963	68811	74212	10179	75051	50849	60982	49189	65997	59871	67253	68874	71585	59776	11506	10332	7763	15411	14856	14089	21894	65456	73088	10924	10845	10633	11506	10332	7763	76467	76963	68811	65571	65641	60389	59890	54333	55972	0	0	0
13 min 20 s	54760	15440	16123	76239	76905	68836	74455	10215	74942	51546	61412	49755	67549	60735	68401	69247	72093	59995	11643	10311	7819	15693	15223	14350	21944	66413	74447	11102	10917	10772	11643	10311	7819	76239	76905	68836	66330	66605	61415	60278	54824	56417	0	0	0
14 min	56679	15726	16410	76202	76873	68953	74334	10248	74894	52303	62014	50201	69268	61606	69463	69854	72342	60100	11697	10332	7909	16033	15541	14687	22055	67123	75177	11258	11050	10872	11697	10332	7909	76202	76873	68953	67471	67310	62330	61039	55135	56633	0	0	0
14 min 40 s	58579	15998	16576	76171	76943	68993	74567	10238	74733	52901	62304	51022	70809	62096	70091	70182	72435	59983	11851	10421	7993	16414	15852	15019	22182	67708	76287	11341	11165	10964	11851	10421	7993	76171	76943	68993	68040	68248	63105	61634	55457	56817	0	0	0
15 min 20 s	60467	16194	16911	77424	18648	19409	74391	10275	74835	53679	62609	51361	72172	62912	70916	70332	72649	60188	11987	10430	8058	16758	16156	15382	22241	68551	77455	11504	11223	11090	11987	10430	8058	77424	18648	19409	68746	68683	63949	61886	55708	57322	0	0	0
16 min	62354	16574	17206	79356	18806	19670	74282	10274	75022	53976	62858	51761	73627	63475	71954	70721	72929	60065	12061	10467	8143	17124	16568	15805	22401	68838	78242	11640	11307	11206	12061	10467	8143	79356	18806	19670	69540	69285	64702	62390	56171	57534	0	0	0
16 min 40 s	64022	16686	17374	80579	19080	19971	74361	10288	74383	54625	63339	51928	75205	63834	72308	70888	73194	60265	12135	10551	8185	17469	16851	16105	22369	69503	79333	11768	11447	11336	12135	10551	8185	80579	19080	19971	69993	69994	65255	62831	56362	57804	0	0	0
17 min 20 s	65783	16995	17651	82636	19364	20122	74365	10287	74601	54797	63360	52467	76525	64472	73027	71059	73245	60302	12298	10582	8253	17794	17217	16467	22426	69852	79683	11909	11490	11436	12298	10582	8253	82636	19364	20122	70663	70315	66089	63215	56744	58228	0	0	0
18 min	67535	17254	17943	83677	19564	20424	74425	10274	74795	55266	63662	52871	77861	64827	73504	71357	73454	60338	12409	10658	8336	18187	17603	16870	22474	70315	80680	11951	11643	11564	12409	10658	8336	83677	19564	20424	70798	70650	66316	63652	57011	58463	0	0	0
18 min 40 s	69354	17448	18118	85075	19801	20613	74196	10256	74492	55822	63821	53175	79453	65310	74291	71368	73589	60562	12494	10724	8404	18547	17924	17288	22582	71105	81193	12117	11741	11681	12494	10724	8404	85075	19801	20613	71408	71233	67147	64275	57252	58786	0	0	0
19 min 20 s	70791	17743	18392	86582	19972	20882	74092	10278	74626	56148	64000	53434	80483	65574	74592	71251	73812	60564	12587	10753	8462	18892	18205	17625	22666	71290	81549	12213	11844	11793	12587	10753	8462	86582	19972	20882	71820	71413	67630	64457	57429	58666	0	0	0
20 min	72472	17946	18696	87973	20224	21122	74226	10336	74536	56263	64071	53450	81645	65941	74955	71414	73620	60595	12690	10836	8555	19304	18646	18040	22723	71591	82469	12281	11918	11898	12690	10836	8555	87973	20224	21122	72177	71842	67990	64762	57532	59021	0	0	0
20 min 40 s	74431	18268	18904	89224	20452	21304	74362	10297	74287	56498	64309	53638	83292	66412	75587	71365	73611	60439	12790	10885	8596	19586	18934	18385	22778	72088	83014	12415	12019	12047	12790	10885	8596	89224	20452	21304	72804	72184	68425	65099	57570	59232	0	0	0
21 min 20 s	76001	18432	19134	90623	20718	21636	74288	10300	74325	56796	64566	53912	84374	66616	75973	71626	73928	60611	12889	10926	8677	19994	19288	18785	22748	72290	83170	12562	12079	12157	12889	10926	8677	90623	20718	21636	72786	71985	68836	65314	57803	59265	0	0	0
22 min	77424	18648	19409	92043	20846	21883	74194	10312	74467	57061	64539	54029	85446	66710	75776	71674	73707	60393	13006	11070	8735	20306	19627	19210	22633	72438	83691	12642	12169	12237	13006	11070	8735	92043	20846	21883	73184	72339	68837	65569	58127	59380	0	0	0
22 min 40 s	79356	18806	19670	93225	21097	22152	73876	10320	74150	56997	64566	54338	86935	67050	76107	71713	73856	60373	13083	11076	8790	20668	20059	19506	22798	72701	83989	12774	12294	12416	13083	11076	8790	93225	21097	22152	73211	72152	69310	65567	58256	59620	0	0	0
23 min 20 s	80579	19080	19971	94468	21301	22368	74114	10294	74088	57258	64771	54492	88205	67107	76427	72205	73875	60536	13157	11152	8852	21090	20327	19940	22807	73081	84341	12913	12330	12450	13157	11152	8852	94468	21301	22368	73219	72511	69525	66157	58233	59741	0	0	0
24 min	82636	19364	20122	95733	21615	22609	74094	10336	74231	57464	64889	54403	89318	67627	76622	71961	73885	60446	13251	11249	8887	21468	20667	20313	22879	72725	84471	13073	12478	12597	13251	11249	8887	95733	21615	22609	73651	72823	69833	66299	58393	59790	0	0	0
24 min 40 s	83677	19564	20424	96994	21754	22786	73895	10325	74152	57749	64907	54744	90335	67636	76983	71811	73747	60733	13325	11333	8958	21836	21072	20657	22876	72935	85181	13189	12544	12659	13325	11333	8958	96994	21754	22786	73851	72741	70002	66423	58421	59750	0	0	0
25 min 20 s	85075	19801	20613	98499	21977	23009	74106	10315	73984	57716	65117	54933	91718	67735	77384	71957	73737	60305	13499	11411	9045	22225	21474	21161	22850	73080	85262	13240	12659	12833	13499	11411	9045	98499	21977	23009	74006	73035	70211	66696	58577	59774	0	0	0
26 min	86582	19972	20882	99605	22150	23198	73954	10328	73739	57962	64925	55015	92629	67914	77625	72067	73740	60489	13598	11464	9083	22607	21741	21428	22970	73329	85848	13321	12725	12916	13598	11464	9083	99605	22150	23198	73813	72859	70435	66918	58535	59939	0	0	0
26 min 40 s	87973	20224	21122	100870	22304	23462	73824	10341	73762	58147	65059	55123	93582	68065	77517	71798	73849	60602	13649	11461	9149	22968	22048	21887	22977	73335	85596	13533	12833	13102	13649	11461	9149	100870	22304	23462	74053	72822	71064	67044	58703	59995	0	0	0
27 min 20 s	89224	20452	21304	102183	22626	23659	73725	10364	73623	58325	65046	55386	94336	68026	77852	71690	74082	60561	13744	11601	9234	23401	22502	22236	22913	73230	85830	13697	12898	13171	13744	11601	9234	102183	22626	23659	74079	72989	71137	67114	58831	60023	0	0	0
28 min	90623	20718	21636	103258	22753	23806	73709	10328	73330	58379	65392	55371	95710	68337	77572	72040	73711	60238	13860	11695	9244	23774	22862	22643	23024	73617	86181	13775	13065	13275	13860	11695	9244	103258	22753	23806	74302	73072	71307	67386	58597	60089	0	0	0
28 min 40 s	92043	20846	21883	104731	22990	24088	73532	10341	73250	58592	64982	55513	96465	68542	77880	71920	73811	60373	13973	11729	9337	24125	23254	22931	22914	73636	86406	13931	13078	13412	13973	11729	9337	104731	22990	24088	74303	73148	71336	67314	58781	60278	0	0	0
29 min 20 s	93225	21097	22152	105891	23268	24241	73713	10322	73300	58711	65354	55536	97599	68356	77685	71927	73717	60374	14024	11847	9441	24541	23500	23408	22950	73638	86076	13997	13218	13531	14024	11847	9441	105891	23268	24241	74437	73283	71737	67354	58712	60299	0	0	0
30 min	94468	21301	22368	107018	23434	24529	73458	10336	73101	58896	65347	55626	98809	68731	77883	71943	73548	60653	14165	11874	9529	24949	23997	23701	23012	73776	86424	14137	13311	13678	14165	11874	9529	107018	23434	24529	74534	73230	71612	67480	58963	60145	0	0	0
30 min 40 s	95733	21615	22609	107941	23494	24717	73312	10330	72950	58845	65297	55488	99466	68817	78253	71912	73645	60152	14256	11907	9553	25414	24210	24169	22916	73679	86615	14262	13400	13722	14256	11907	9553	107941	23494	24717	74452	73201	71784	67442	58812	60155	0	0	0
31 min 20 s	96994	21754	22786	109284	23775	24955	73422	10372	73055	58741	65343	55654	100155	68630	78128	71928	73663	60107	14365	12003	9665	25862	24754	24553	23014	73679	86776	14374	13480	13873	14365	12003	9665	109284	23775	24955	74515	73343	72086	67717	58991	60260	0	0	0
32 min	98499	21977	23009	110283	24051	25098	73209	10312	73259	59078	65441	55725	101508	68663	78225	71748	73481	60160	14449	12100	9691	26244	25077	24908	22945	73703	86542	14486	13582	13964	14449	12100	9691	110283	24051	25098	74390	73232	72053	68060	58809	60341	0	0	0
32 min 40 s	99605	22150	23198	111510	24199	25273	73254	10363	73156	58995	65317	55734	102360	68579	78443	71771	73702	60296	14511	12142	9774	26703	25496	25273	22981	73724	86553	14619	13650	14090	14511	12142	9774	111510	24199	25273	74167	73072	72064	69540	69285	64702	0	0	0
33 min 20 s	100870	22304	23462	112455	24413	25553	73122	10372	73105	59047	65347	55863	103118	68757	78366	71885	73224	60209	14610	12192	9843	27159	25873	25587	22975	74051	86887	14701	13747	14185	14610	12192	9843	112455	24413	25553	74405	73107	72056	69993	69994	65255	0	0	0
34 min	102183	22626	23659	102183	22626	23659	73125	10369	72870	58851	65132	55650	103895	68498	78256	71615	73300	60048	14678	12292	9868	27648	26310	25969	22974	73675	86786	14804	13809	14264	14678	12292	9868	102183	22626	23659	74156	72936	72159	70663	70315	66089	0	0	0
34 min 40 s	103258	22753	23806	103258	22753	23806	76596	76843	69632	58935	65060	55734	104619	68857	78169	71803	73266	60017	14802	12325	9936	27987	26491	26303	23026	73866	86860	14946	13904	14403	14802	12325	9936	103258	22753	23806	74338	73027	71973	70798	70650	66316	0	0	0
35 min 20 s	104731	22990	24088	104731	22990	24088	76680	76900	69498	58914	65382	55968	105514	68607	78209	71580	73244	59985	14900	12448	10060	28376	26948	26779	23028	73520	86695	15034	13960	14499	14900	12448	10060	104731	22990	24088	74433	72869	72201	71408	71233	67147	0	0	0
36 min	105891	23268	24241	105891	23268	24241	76582	76948	69477	58958	65254	55760	106512	68639	78296	71748	73091	60062	14968	12448	10119	28899	27306	27188	22986	73829	86773	15065	14087	14597	14968	12448	10119	105891	23268	24241	74272	72772	72213	71820	71413	67630	0	0	0
36 min 40 s	107018	23434	24529	107018	23434	24529	76691	77247	69627	58950	65083	55809	107228	68437	78143	71392	73117	60017	15074	12530	10178	29421	27643	27434	22987	73771	86609	15243	14162	14705	15074	12530	10178	107018	23434	24529	74252	72897	72293	72177	71842	67990	0	0	0
37 min 20 s	107941	23494	24717	107941	23494	24717	76882	77189	69386	59037	65185	55719	108379	68423	78360	71392	73131	59831	15182	12575	10255	29939	28050	27853	22993	73961	86947	15331	14225	14828	15182	12575	10255	107941	23494	24717	74127	72984	72386	72804	72184	68425	0	0	0
38 min	109284	23775	24955	109284	23775	24955	77071	77353	69460	58754	65183	55779	109020	68422	78176	71416	73154	60110	15223	12637	10314	30435	28524	28210	23024	73733	87266	15514	14311	14935	15223	12637	10314	109284	23775	24955	74191	73108	72465	72786	71985	68836	0	0	0
38 min 40 s	110283	24051	25098	110283	24051	25098	76761	77194	69342	58996	65156	55901	109896	68443	78106	72664	9872	73165	15354	12713	10395	30930	28816	28635	22971	73610	86843	15621	14423	15055	15354	12713	10395	110283	24051	25098	74223	72757	72249	73184	72339	68837	0	0	0
39 min 20 s	111510	24199	25273	111510	24199	25273	76955	77344	69501	59207	64966	55539	110711	68590	77980	73551	9923	74110	15462	12810	10456	31266	29364	29170	23023	73818	87076	15755	14478	15202	15462	12810	10456	111510	24199	25273	74066	72757	72434	73211	72152	69310	0	0	0
40 min	112455	24413	25553	112455	24413	25553	76987	77656	69435	59096	65062	55736	111072	68407	78065	74181	9931	74580	15531	12842	10532	31915	29710	29471	22962	73443	86711	15821	14599	15272	15531	12842	10532	112455	24413	25553	74031	72865	72125	73219	72511	69525	0	0	0
AUC
B. asper
	Positive			B. asper			B. asper +SAIMR POLY			B. asper+ EAV 1			B. asper+EAV 2			EAV 1			EAV 2			SAIMR POLY			Negative
Total Area	3050925	3548124	2923773	1149284	1066344	1109720	1169358	802599	867927	595575	521790	538567	661747	593110	610936	466923	455373	386432	471661	488292	579247	553643	571940	527574	506494	515968	506494
B. jararaca
	Positive			B. jraraca			B. jaraca +SAIMR POLY			B. jararca+ EAV 1			B. jararca+EAV 2			EAV 1			EAV 2			SAIMR POLY			Negative
Total Area	3050925	3548124	2923773	4137097	4050598	3783407	1801011	2261087	1628196	816251	851514	698712	2149269	2013857	1611056	466923	455373	386432	471661	488292	579247	553643	571940	527574	506494	515968	626138
E. ocellatus
	Positive			E. ocellatus			E. ocellatus+SAIMR POLY			E. ocellatus+EAV 1			E. ocellatus+EAV 2			EAV 1			EAV 2			SAIMR POLY			Negative
Total Area	3050925	3548124	2923773	4319585	605961	4338090	2265368	2028093	2271511	1338064	1607968	1295670	1024423	542976	598325	466923	455373	386432	471661	488292	579247	553643	571940	527574	506494	515968	626138
C. rhodostoma
	Positive			C. rhodostoma			C. rhodostoma+ SAIMR POLY			C. rhodostoma+EAV 1			C. rhodostoma+EAV 2			EAV 1			EAV 2			SAIMR POLY			Negative
Total Area	3050925	3548124	2923773	3050925	3548124	2923773	3191967	4334095	3298830	793772	714316	796909	1024423	991776	891103	466923	455373	386432	471661	488292	579247	553643	571940	527574	506494	515968	626138
D. typus
	Positive			D. typus			D. typus +SAIMR POLY			D. typus+EAV 1			D. typus+EAV 2			EAV 1			EAV 2			SAIMR POLY			Negative
Total Area	3050925	3548124	2923773	4610242	3597215	4041631	1127463	758770	924012	1049499	903988	856962	1084422	758890	797037	466923	455373	386432	471661	488292	579247	553643	571940	527574	506494	515968	626138
D. acutus
	Positive			D. acutus			D. acutus+ SAIMR POLY			D. acutus +EAV 1			D. acutus +EAV 2			EAV 1			EAV 2			SAIMR POLY			Negative
Total Area	3050925	3548124	2923773	3886548	4045102	3397630	1507168	1820637	1368179	1164393	2108964	1870143	2169371	1938988	1519200	466923	455373	386432	471661	488292	579247	553643	571940	527574	506494	515968	626138
B. arietans
	Positive			B. arietans			B. arietans+SAIMR POLY			B. arietans+EAV 1			B. arietans+EAV 2			EAV 1			EAV 2			SAIMR POLY			Negative
Total Area	7947593	7319614	7599966	5704219	5546223	5226157	1174105	1328239	1297593	2484111	2421525	2497404	2238844	2464315	2314980	1533799	1573990	1455305	1521300	1507419	1450438	1822164	1652133	1810106	2107460	2022172	1657674
E. carinatus
	Positive			E. carinatus			E. carinatus+SAIMR POLY			E. carinatus+EAV 1			E. carinatus+EAV 2			EAV 1			EAV 2			SAIMR POLY			Negative
Total Area	3050925	3548124	2923773	1269474	3885770	4428260	1617472	2178247	2822425	1500328	1608059	1387986	1813781	1967037	1770714	466923	455373	386432	471661	488292	579247	553643	571940	527574	506494	515968	626138
C. atrox
	Positive			C. atrox			C. atrox+SAIMR POLY			C. atrox+EAV 1			C. atrox+EAV 2			EAV 1			EAV 2			SAIMR POLY			Negative
Total Area	7947593	7319614	7599966	13117557	14047382	13186110	1837928	2283768	2144684	5904368	5053548	5551256	3918348	7530023	5865881	1533799	1573990	1455305	1521300	1507419	1450438	1822164	1652133	1810106	1312757	1270376	1281108
Mix 1
	Positive			Mix I			Mix I + SAIMR POLY			Mix I +EAV 1			Mix II+EAV 2			EAV 1			EAV 2			SAIMR POLY			Negative
Total Area	3050925	3548124	2923773	3897816	3867042	3662931	1888227	1814619	1653630	964795	967420	823051	1570607	1573237	1680198	466923	455373	386432	471661	488292	579247	553643	571940	527574	506494	515968	626138
Mix 2
	Positive			Mix II			Mix II +SAIMR POLY			Mix II+EAV 1			Mix II+EAV 2			EAV 1			EAV 2			SAIMR POLY			Negative
Total Area	3050925	3548124	2923773	3221158	2915026	3024918	1888227	1814619	1653630	1400699	1391083	1131736	2105551	1771866	1455333	466923	455373	386432	471661	488292	579247	553643	571940	527574	506494	515968	626138
T. albo
	Positive			T. albolabris			T. albolabris +SAIMR POLY			T. albolabris+EAV 1			T. albolabris+EAV 2			EAV 1			EAV 2			SAIMR POLY			Negative
Total Area	3050925	3548124	2923773	754029	660823	505312	726915	616153	682935	611080	533969	512552	598325	576131	571592	466923	455373	386432	471661	488292	579247	553643	571940	527574	506494	515968	626138
R. sub
	Positive			R. subminiatus			R. subminiatus +SAIMR POLY			R. subminiatus+EAV 1			R. subminiatus+EAV 2			EAV 1			EAV 2			SAIMR POLY			Negative
Total Area	3050925	3548124	2923773	740134	711178	718449	736143	856603	720901	471814	449704	363501	543469	477628	491789	466923	455373	386432	471661	488292	579247	553643	571940	527574	506494	515968	626138
D. russ
	Positive			D. russelii			D. russelii +SAIMR POLY			D. russelii+EAV 1			D. russelii+EAV 2			EAV 1			EAV 2			SAIMR POLY			Negative
Total Area	3050925	3548124	2923773	541605	516749	532728	719024	665630	673918	492451	389208	435230	542976	543950	478566	466923	455373	386432	471661	488292	579247	553643	571940	527574	506494	515968	626138
Percentage reduction of venom+antivenoms activity
	EAV 1			EAV 2			SAIMR POLY
Bothrops asper	76.0674	78.0674	77.4682	73.3791	72.3791	70.9468	54.7336	54.7336	51.7886
Bothrops jararaca	80.27	78.9781	81.5322	48.0489	50.2825	57.4179	56.4668	44.1789	56.9648
Echis ocellatus	69.0233	70.1327	70.1327	76.2842	86.2076	86.2076	47.5559	47.638	47.638
Calloselasma rhodostoma	68.8036	76.442	67.0328	59.7386	67.2914	63.1361	0	0	0
Dispholidus typus	77.2355	74.8698	78.7966	76.478	78.9034	80.2793	75.5444	78.9067	77.1376
Deinagkistrodon acutus	47.8638	47.8638	44.9574	44.1826	52.0658	55.2865	61.2209	54.9916	59.7314
Bitis arietans	56.4513	56.3392	52.2134	60.7511	55.5677	55.704	79.4169	76.0515	75.1712
Echis carinatus	58.6167	58.6167	68.6562	49.3785	49.3785	60.0133	43.943	43.943	36.2633
Crotalus atrox	54.9888	64.025	57.9007	55.5147	46.3955	55.5147	85.9888	83.7424	83.7353
Immunogen mixture 1	75.2478	74.983	77.5303	59.7055	59.3168	54.1297	51.5568	53.0748	54.855
Immunogen mixture 2	56.5157	52.2789	62.5862	34.6337	39.2161	51.8885	41.3805	37.7495	45.3331

## Sheet: In vitro plasma assay
Plasma assay:in vitro venom activity
	Bothrops asper			Bothrops jararca			Calloselasma rhodostoma			Dispholidus typus			Deinagkistrodon acutus			Daboia russelii			Bitis arietans			Echis carinatus			Rhabdophis subminiatus			Trimeresurus albolabris			Crotalus atrox			Immunogen mixture I			Immunogen mixture II			Negative
	25	23	24	24	25	24	25	27	22	20	21	22	22	22	21	25	24	26	10	10	8	25	24	24	25	23	25	12	10	11	12	15	11	25	25	26	25	25	24	0	0	0
AUC Plasma assay for venoms+antivenoms
	B. asper			EAV 1			EAV 2			asper +EAV 1			B. asper +EAV 2			B. asper +SAIMR POLY			SAIMR POLY			Plasma
Total Area	32.72	32.39	31.31	14.1	13.42	12.83	16.87	16.65	16.23	9.087	7.097	5.751	10.48	9.917	10.86	31.38	29.21	30.37	21.44	21.6	20.84	13.68	16.52	15.55
	B. jararca			B. jararca +EAV 1			B. jararca+EAV 2			B. jararca+SAIMR POLY			EAV 1			EAV 2			SAIMR POLY			Plasma
Total Area	42.97	41.34	42.75	13.74	10.38	11.2	18.4	14.07	17.88	42.15	41.25	41.87	22.99	21.62	21.64	25.69	25.07	25.19	31.68	30.42	31.87	21.93	24.8	21.6
	C. rhodostoma			C. rhodostoma +EAV 1			C. rhodostoma+ EAV 2			C. rhodostoma +SP			EAV 1			EAV 2			SAIMR POLY			Plasma
Total Area	45.07	44.66	41.87	12.16	8.361	10.77	15.19	9.509	10.47	45.07	44.66	41.87	24.89	22.71	22.83	27.27	27.07	26.69	37.28	35.86	34.43	25.04	27.94	24.37
	E. ocellatus			E. ocellatus +EAV1			E. ocellatus +EAV 2			E. ocellatus +SAIMR POLY			EAV 1			EAV 2			SAIMR POLY			Plasma
Total Area	30.02	30.54	34.82	8.526	6.303	5.721	15.52	16.25	17.32	30.11	30.47	34.71	12.5	12.02	11.36	15.23	15.03	14.76	19.16	19.57	20.71	11.92	14.9	12.09
	D. typus			D. typus +EAV 1			D. typus +EAV 2			D. typus +SAIMR POLY			EAV 1			EAV 2			SAIMR POLY			Plasma
Total Area	26.3	26.94	25.99	8.333	5.625	7.258	5.297	5.589	5.22	26.27	26.73	25.94	10.98	10.69	9.964	13.45	13.41	12.99	16.17	16.73	15.98	10.51	12.87	10.53
	D. acutus			D. acutus +EAV 1			D. acutus +EAV 2			D. acutus +SAIMR POLY			EAV 1			EAV 2			SAIMR POLY			Plasma
Total Area	35.09	38.25	34.61	10.57	6.539	7.275	6.56	6.155	6.445	34.66	38.04	33.94	20.57	19.11	18.86	22.92	22.8	22.47	30.54	31.34	30.04	19.94	23.26	19.94
	D.russelii			D. ruuselii+ EAV 1			D. russelii +EAV 2			D.russelii+ SAIMR POLY			EAV 1			EAV 2			SAIMR POLY			Plasma
Total Area	30.6	29.48	30.81	7.053	5.783	6.328	4.823	4.979	5.419	30.6	29.48	30.81	12.5	12.02	11.36	15.23	14.99	14.68	19.31	19.07	19.49	11.93	14.89	12.07
	B. areitans			B.areitans+ EAV 1			B. areitans +EAV 2			B.areitans+ SAIMR POLY			EAV 1			EAV 2			SAIMR POLY			Plasma
Total Area	24.57	22.24	22.13	9.724	7.567	7.479	6.161	5.891	6.395	33.82	38.85	34.36	23.5	21.44	21.59	25.74	25.69	25.39	33.61	33.07	33.3	23.01	26.29	22.91
	E. carinatus			E. carinatus +EAV 1			E. carinatus +EAV 2			E. carinatus+ SAIMR POLY			EAV 1			EAV 2			SAIMR POLY			Plasma
Total Area	35.96	34.13	34.14	10.41	11.84	8.264	5.222	4.989	5.417	34.26	34.12	33.17	15.77	14.86	14.38	18.53	18.29	17.89	23.64	23.45	22.89	15.3	18.28	15.3
	R. sub			R. sub + EAV 1			R. sub +EAV 2			R. sub+SAIMR POLY			EAV 1			EAV 2			SAIMR POLY			Plasma
Total Area	33.12	31.34	31.43	9.435	11.06	7.499	4.863	4.644	5.04	31.42	31.33	30.46	13.02	12.48	11.84	15.77	15.54	15.18	20.81	20.66	20.18	12.46	15.49	12.59
	T. albo			T. albo+EAV 1			T. albo+EAV 2			T. albo+SAIMR POLY			EAV 1			EAV 2			SAIMR POLY			Plasma	Plasma	Plasma
Total Area	50.62	33.08	26.32	7.932	7.376	7.377	10.67	7.895	9.865	35.34	23.56	30.65	30.97	27.74	28.62	32.54	32.69	32.52	32.99	38.18	34.67	33.61	33.38	33.55
	C. atrox			C. atrox +EAV 1			C. atrox +EAV 2			C. atrox + SAIMR POLY			EAV 1			EAV 2			SAIMR POLY			Plasma
Total Area	21.05	18.58	15.65	7.841	5.571	5.327	4.885	6.429	5.486	25.39	23.66	20.73	12.51	12.05	11.32	15.26	14.95	14.39	18.19	16.33	13.79	11.92	14.92	12.06
	Immunogen mixture 1			Immunogen mixture 1+EAV 1			Immunogen mixture 1 +EAV 2			Immunogen mixture 1+ SAIMR POLY			EAV 1			EAV 2			SAIMR POLY			Plasma
Total Area	29.63	32.19	29.05	6.459	6.101	7.61	19.45	13.18	13.23	29	31.67	28.96	12.5	12.02	11.36	15.22	15.02	14.64	18.48	20	18.3	11.91	14.88	12.02
	Immunogen mixture 2			Immunogen mixture 2+EAV 1			Immunogen mixture 2 +EAV 2			Immunogen mixture 2+ SAIMR POLY			EAV 1			EAV 2			SAIMR POLY			Plasma
Total Area	36	35.7	35.54	8.819	5.729	7.526	22.77	15.99	16.1	35.86	35.58	35.17	16.91	15.84	15.44	19.58	19.39	19.03	24.63	24.31	23.9	16.33	19.43	16.36
Percentage reduction of venom+antivenoms activity
	EAV 1			EAV 2			SAIMR polyvalent
Bothrops asper	66.1671	55.0795	70.0832	70.4535	62.1162	50.2355	0	0	0
Bothrops jararaca	52.2742	55.2804	67.3795	44.958	52.2742	55.2804	0	0	0
Echis ocellatus	52.895	59.6995	74.8306	14.2541	13.0737	23.8011	0	0	0
Calloselasma rhodostoma	62.2228	67.571	66.2327	60.2911	75.994	70.4571	0	0	0
Dispholidus typus	47.2261	65.8979	53.053	66.4535	66.1162	66.2355	0	0	0
Deinagkistrodon acutus	30.231	56.3776	50.409	56.6997	58.9393	56.0668	0	0	0
Daboia russelii	62.2228	67.571	66.2327	74.1671	72.0795	71.0832	0	0	0
Echis carinatus	52.8193	40.1412	60.1964	75.6821	74.8658	73.2484	0	0	0
Rhabdophis subminiatus	68.0583	68.8961	56.8546	66.5127	52.2326	72.864	0	0	0
Crotalus atrox	20.8439	17.9285	18.0584	14.2541	13.0737	25.8011	0	0	0
Immunogen mixture 1	73.5497	70.7545	65.3141	44.958	52.2742	55.2804	0	0	0
Immunogen mixture 2	73.5497	70.7545	65.3141	55.1671	50.0795	52.0832	0	0	0

## Sheet: In vivo 
Kaplan–Meier survival
B. asper
Time (min)	Venom+EAV 1
360	0
360	0
360	0
360	0
360	0	Venom+EAV 2
36		1
360		0
360		0
360		0
360		0	Venom+SAIMR POLY
1			1
2			1
4			1
8			1
360			0	Venom only
6				1
6				1
14				1
25				1
30				1
C. rhodostoma
Time (min)	Venom+EAV 1
4	1
16	1
124	1
360	0
360	0	Venom+EAV 2
27		1
47		1
53		1
360		0
360		0	Venom+SAIMR POLY
6			1
6			1
6			1
10			1
360			0	Venom only
4				1
4				1
7				1
9				1
9				1
E. carinatus
Time (min)	Venom+EAV 1
11	1
58	1
70	1
112	1
360	0	Venom+EAV 2
8		1
360		0
360		0
360		0
360		0	Venom+SAIMR POLY
2			1
2			1
360			0
360			0
360			0	Venom only
2				1
2				1
6				1
15				1
32				1
D. russelii
Time (min)	Venom+EAV 1
360	0
360	0
360	0
360	0
360	0	Venom+EAV 2
10		1
10		1
15		1
17		1
19		1	Venom+SAIMR POLY
3			1
3			1
5			1
5			1
7			1	Venom only
1				1
1				1
3				1
4				1
5				1
B. arietans
Time (min)	Venom+EAV 1
360	0
360	0
360	0
360	0
360	0	Venom+EAV 2
60		1
360		0
360		0
360		0
360		0	Venom+SAIMR POLY
360			0
360			0
360			0
360			0
360			0	Venom only
7				1
8				1
11				1
13				1
14				1
Vipera ammodytes
Time (min)	Venom+EAV 1
360	0
360	0
360	0
360	0
360	0	Venom+EAV 2
360		0
360		0
360		0
360		0
360		0	Venom+SAIMR POLY
4			1
360			0
360			0
360			0
360			0	Venom only
11				1
14				1
18				1
0				0
0				0
E. ocellatus
Time (min)	Venom+EAV 1
360	0
360	0
360	0
360	0
360	0	Venom+EAV 2
47		1
47		1
59		1
77		1
360		0	Venom+SAIMR POLY
7			1
22			1
22			1
360			0
360			0	Venom only
14				1
18				1
27				1
28				1
48				1
Lachesis muta
Time (min)	Venom+EAV 1
3	1
7	1
7	1
8	1
12	1	Venom+EAV 2
1		1
4		1
5		1
7		1
8		1	Venom+SAIMR POLY
1			1
1			1
2			1
4			1
5			1	Venom only
2				1
3				1
4				1
5				1
6				1
